# Supplementary material for: Enhanced Molecular Networking Shows Microbacterium sp. V1 as a Factory of Antioxidant Proline-Rich Peptides
Source: MDPI journal article supplement (doi:10.3390/md21040256), 2023-04-21
Supplement: s1 [file s1]

Supplementary information

# Enhanced Molecular Networking Shows *Microbacterium* sp. V1 as a Factory of Antioxidant Proline-Rich Peptides

Giovanni Andrea Vitale <sup>1</sup>, Silvia Scarpato <sup>2,3</sup>, Alfonso Mangoni <sup>2</sup>, Maria Valeria D'Auria <sup>2</sup>, Gerardo Della Sala <sup>1\*</sup> and Donatella de Pascale <sup>1\*</sup>

<sup>1</sup> Department of Eco-Sustainable Marine Biotechnology, Stazione Zoologica Anton Dohrn, Via A.F. Acton, Molosiglio, 80133 Naples, Italy; giovanniandrea.vitale@szn.it (G.A.V.);

<sup>2</sup> Department of Pharmacy, University of Naples "Federico II", 80131 Naples, Italy; silvia.scarpato@unina.it (S.S.); alfonso.mangoni@unina.it (A.M.); madauria@unina.it (M.V.D.)

<sup>3</sup> GEOMAR Centre for Marine Biotechnology (GEOMAR-Biotech), Research Unit Marine Natural Products Chemistry, GEOMAR Helmholtz Centre for Ocean Research Kiel, Am Kiel-Kanal 44, 24106 Kiel, Germany

\* Correspondence: gerardo.dellasala@szn.it (G.D.S.); donatella.depascale@szn.it (D.d.P.)

**Table S1.** Mzmine parameters adopted for MS data processing.

**Figure S1.** Positive ion mode HR-ESI mass spectrum of compound 1.

**Figure S2.** HR-MS/MS spectrum of the  $[M+H]^+$  pseudomolecular ion of compound 1.

**Figure S3.** <sup>1</sup>H-NMR spectrum of compound 1, (700 MHz, CD<sub>3</sub>OD).

**Figure S4.** <sup>13</sup>C-NMR spectrum of compound 1, (175 MHz, CD<sub>3</sub>OD).

**Figure S5.** COSY spectrum of compound 1, (700 MHz, CD<sub>3</sub>OD).

**Figure S6.** TOCSY spectrum of compound 1, (700 MHz, CD<sub>3</sub>OD).

**Figure S7.** ROESY spectrum of compound 1, (700 MHz, CD<sub>3</sub>OD).

**Figure S8.** HSQC spectrum of compound 1, (700 MHz, CD<sub>3</sub>OD).

**Figure S9.** Band-selective HMBC spectrum of compound 1, (700 MHz, CD<sub>3</sub>OD).

**Figure S10.** HMBC spectrum of compound 1, (700 MHz, CD<sub>3</sub>OD).

**Figure S11.** Band-selective HMBC spectrum of compound 1, (700 MHz, CD<sub>3</sub>OD).

**Figure S12.** Band-selective HMBC spectrum of compound 1, (700 MHz, CD<sub>3</sub>OD).

**Figure S13.** Advanced Marfey's analysis of compound 1.

**Table S2.** Full NMR data of compound 2, (<sup>1</sup>H 700 MHz, <sup>13</sup>C 175 MHz, CD<sub>3</sub>OD).

**Figure S14.** Positive ion mode HR-ESI mass spectrum of compound 2.

**Figure S15.** HR-MS/MS spectrum of the  $[M+H]^+$  pseudomolecular ion of compound 2.

**Figure S16.** <sup>1</sup>H-NMR spectrum of compound 2, (600 MHz, CD<sub>3</sub>OD).

**Figure S17.** COSY spectrum of compound 2, (700 MHz, CD<sub>3</sub>OD).

**Figure S18.** TOCSY spectrum of compound 2, (700 MHz, CD<sub>3</sub>OD).

**Figure S19.** HSQC spectrum of compound 2, (600 MHz, CD<sub>3</sub>OD).

**Figure S20.** HMBC spectrum of compound 2, (600 MHz, CD<sub>3</sub>OD).

**Figure S21.** HR-MS/MS spectrum of the  $[M+H]^+$  and  $[M+2H]^{2+}$  ions of compound 3.

**Figure S22.** HR-MS/MS spectrum of the  $[M+H]^+$  and  $[M+2H]^{2+}$  ions of compound 4.

**Figure S23. (A)** HR-MS/MS spectrum of the  $[M+H]^+$  pseudomolecular ion of compound 5.

**Figure S24.** HR-MS/MS spectrum of the  $[M+H]^+$  and  $[M+2H]^{2+}$  ions of compound 6.

**Figure S25.** HR-MS/MS spectrum of the  $[M+H]^+$  and  $[M+2H]^{2+}$  ions of compound **7**.

**Figure S26.** HR-MS/MS spectrum of the  $[M+H]^+$  and  $[M+2H]^{2+}$  ions of compound **8**.

**Figure S27.** HRMS spectra showing iron adducts of compounds **1** (A) and **2** (B).

**Table S3.** Ferric reducing antioxidant power assay results of compounds **1** and **2**.

**Figure S28.** Peptidases from *Microbacterium* sp. V1 annotated by using the bioinformatic tool Hotpep-protease.

**Table S1.** Mzmine parameters adopted for MS data processing.

| <b>Mass Detection</b>                                |                   | <b>Join aligner</b>               |     |
|------------------------------------------------------|-------------------|-----------------------------------|-----|
| MS1 Detection                                        | 5·10 <sup>4</sup> | m/z tolerance (ppm)               | 15  |
| MS2 Detection                                        | 1·10 <sup>2</sup> | Weight for mass                   | 50  |
| <b>ADAP Chromatogram builder</b>                     |                   | RT tolerance (min)                | 0.3 |
| Min group size in n° of scans                        | 4                 | Weight for RT                     | 50  |
| Group intensity threshold                            | 5·10 <sup>4</sup> | <b>Peak filter</b>                |     |
| Min highest intensity                                | 5·10 <sup>4</sup> | Keep only features with MSMS scan | V   |
| m/z tolerance (ppm)                                  | 20                | <b>Gap Filling-Peak finder</b>    |     |
| <b>Chromatogram deconvolution (Baseline cut-off)</b> |                   | Intensity tolerance               | 10% |
| Min peak height                                      | 5·10 <sup>4</sup> | m/z tolerance (ppm)               | 20  |
| Peak duration range (min)                            | 0-3               | RT tolerance (min)                | 0.5 |
| Baseline level                                       | 5·10 <sup>4</sup> |                                   |     |
| m/z range for MS2 scan pairing (Da)                  | 0.002             |                                   |     |
| RT range for MS2 scan pairing (min)                  | 0.3               |                                   |     |

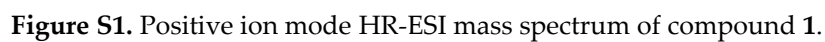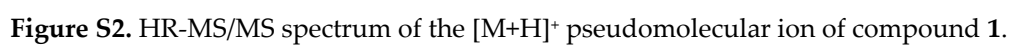

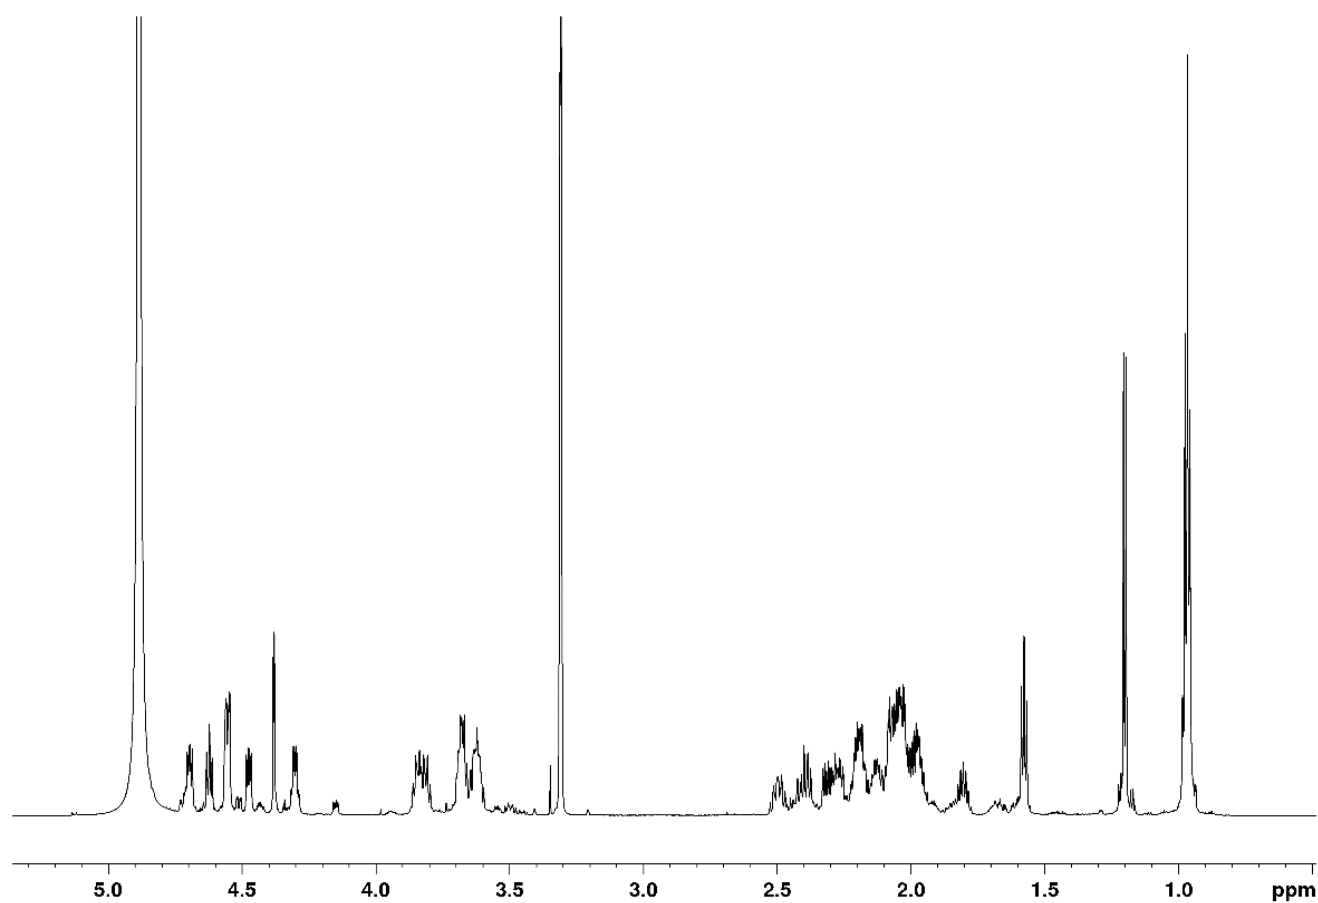

**Figure S3.** <sup>1</sup>H-NMR spectrum of compound 1 (700 MHz, CD<sub>3</sub>OD).

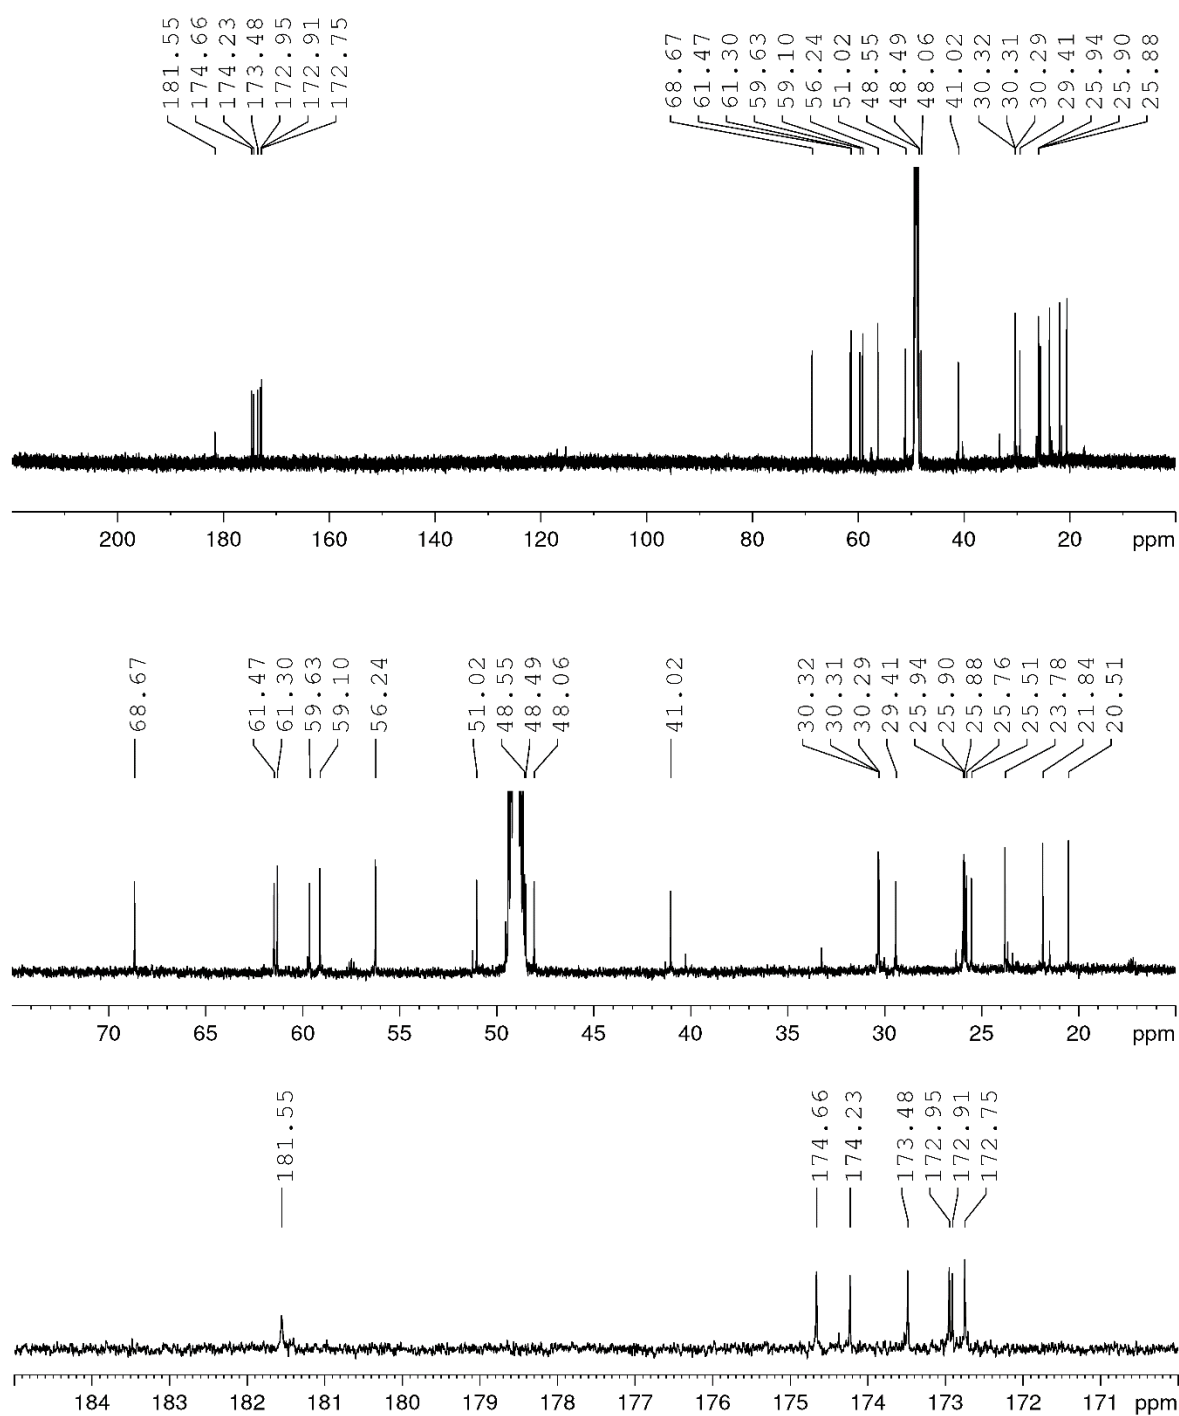

**Figure S4.**  $^{13}\text{C}$ -NMR spectrum of compound 1 (175 MHz,  $\text{CD}_3\text{OD}$ ).

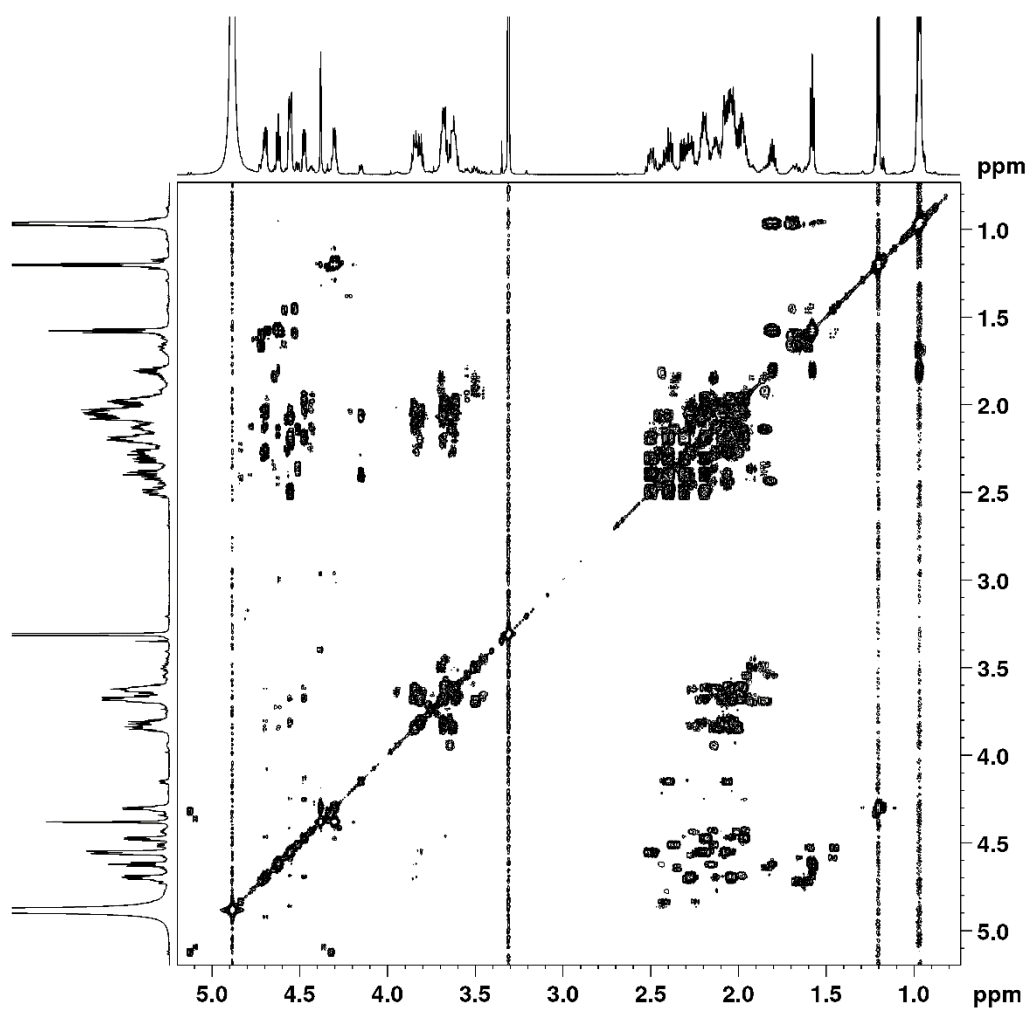

Figure S5. COSY spectrum of compound 1 (700 MHz, CD<sub>3</sub>OD).

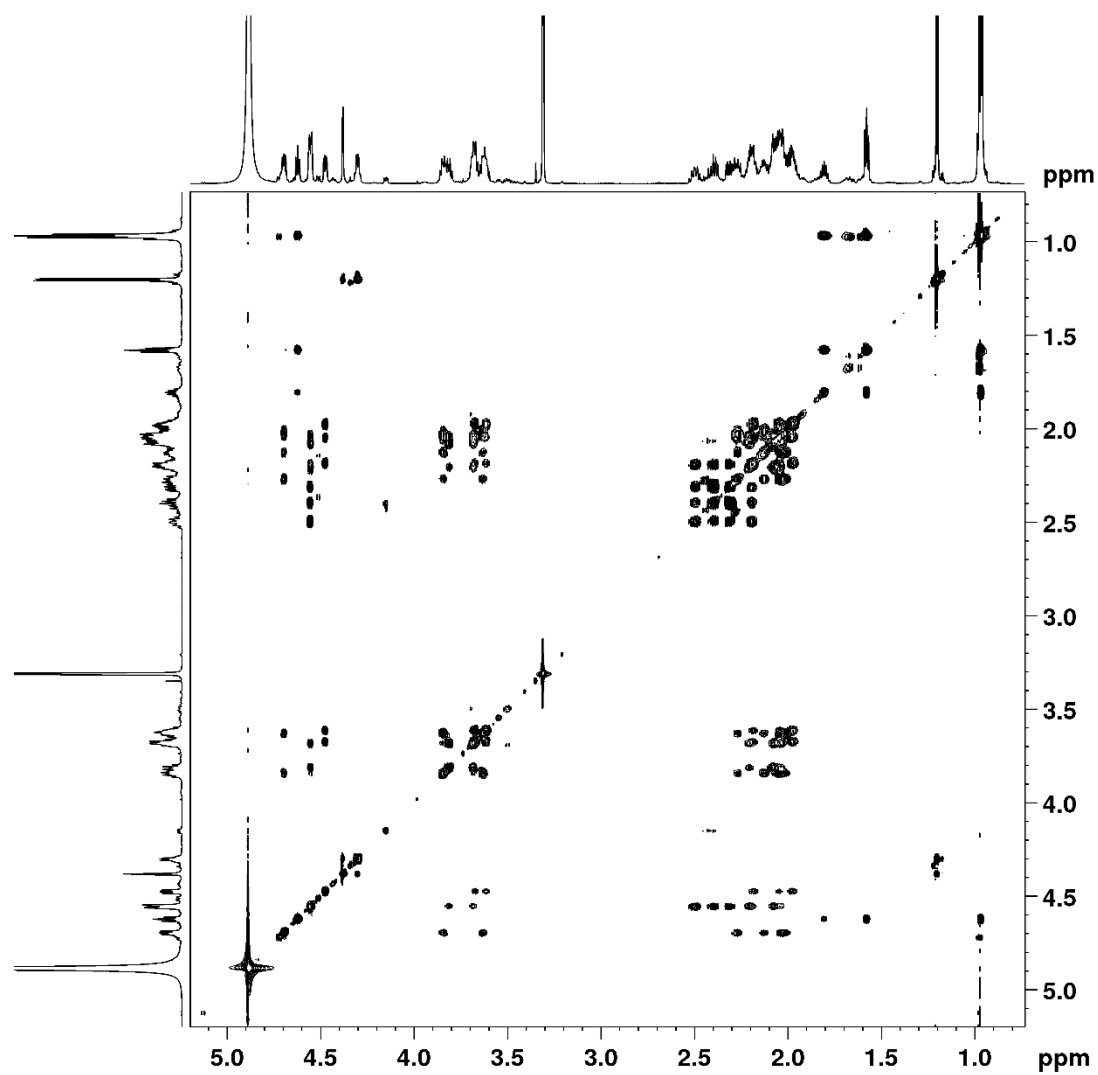

Figure S6. TOCSY spectrum of compound 1 (700 MHz, CD<sub>3</sub>OD).



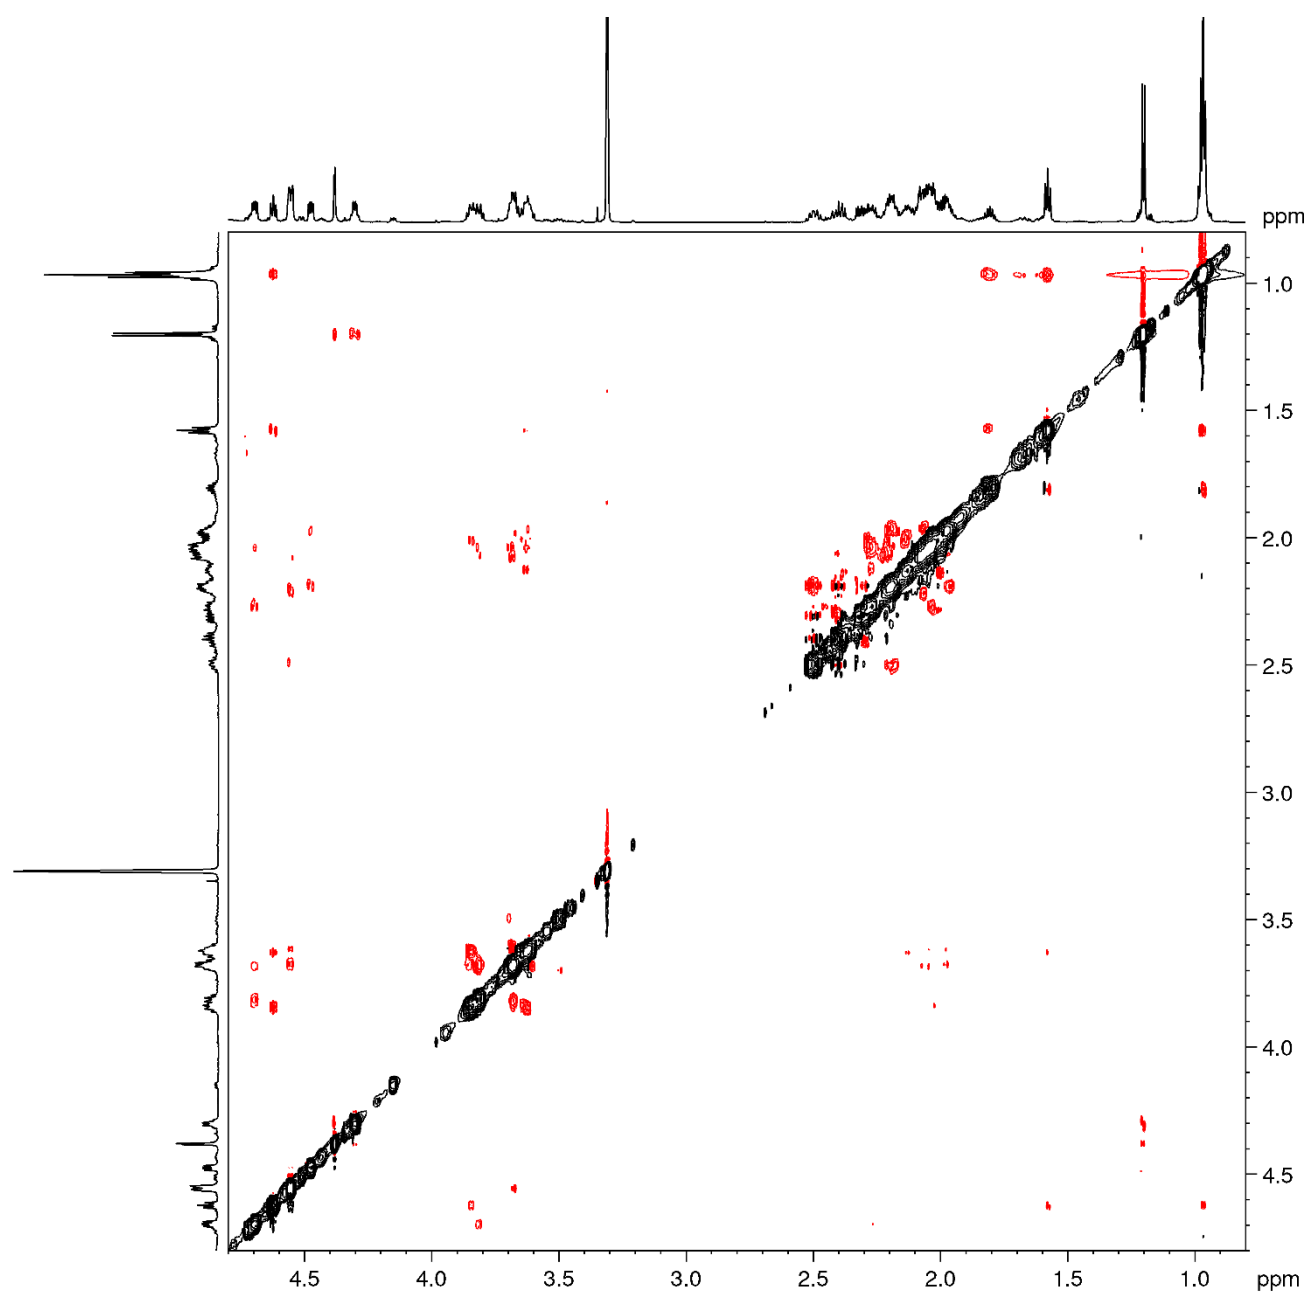

Figure S7. ROESY spectrum of compound **1** (**1**) (700 MHz, CD<sub>3</sub>OD).

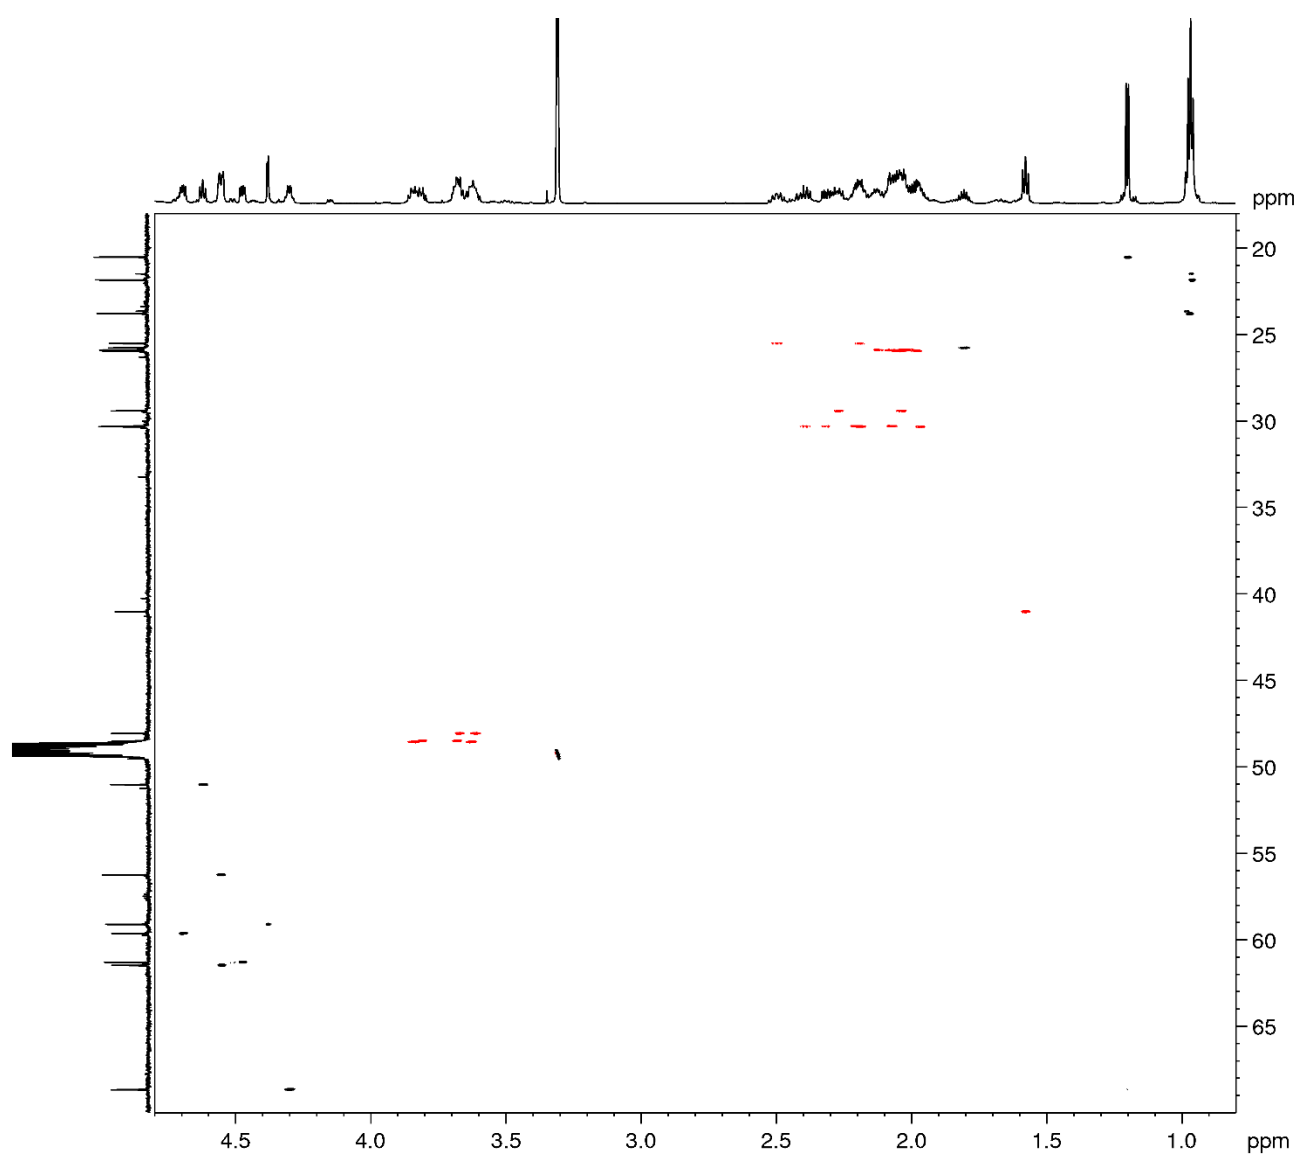

**Figure S8.** HSQC spectrum of compound 1 (700 MHz, CD<sub>3</sub>OD).

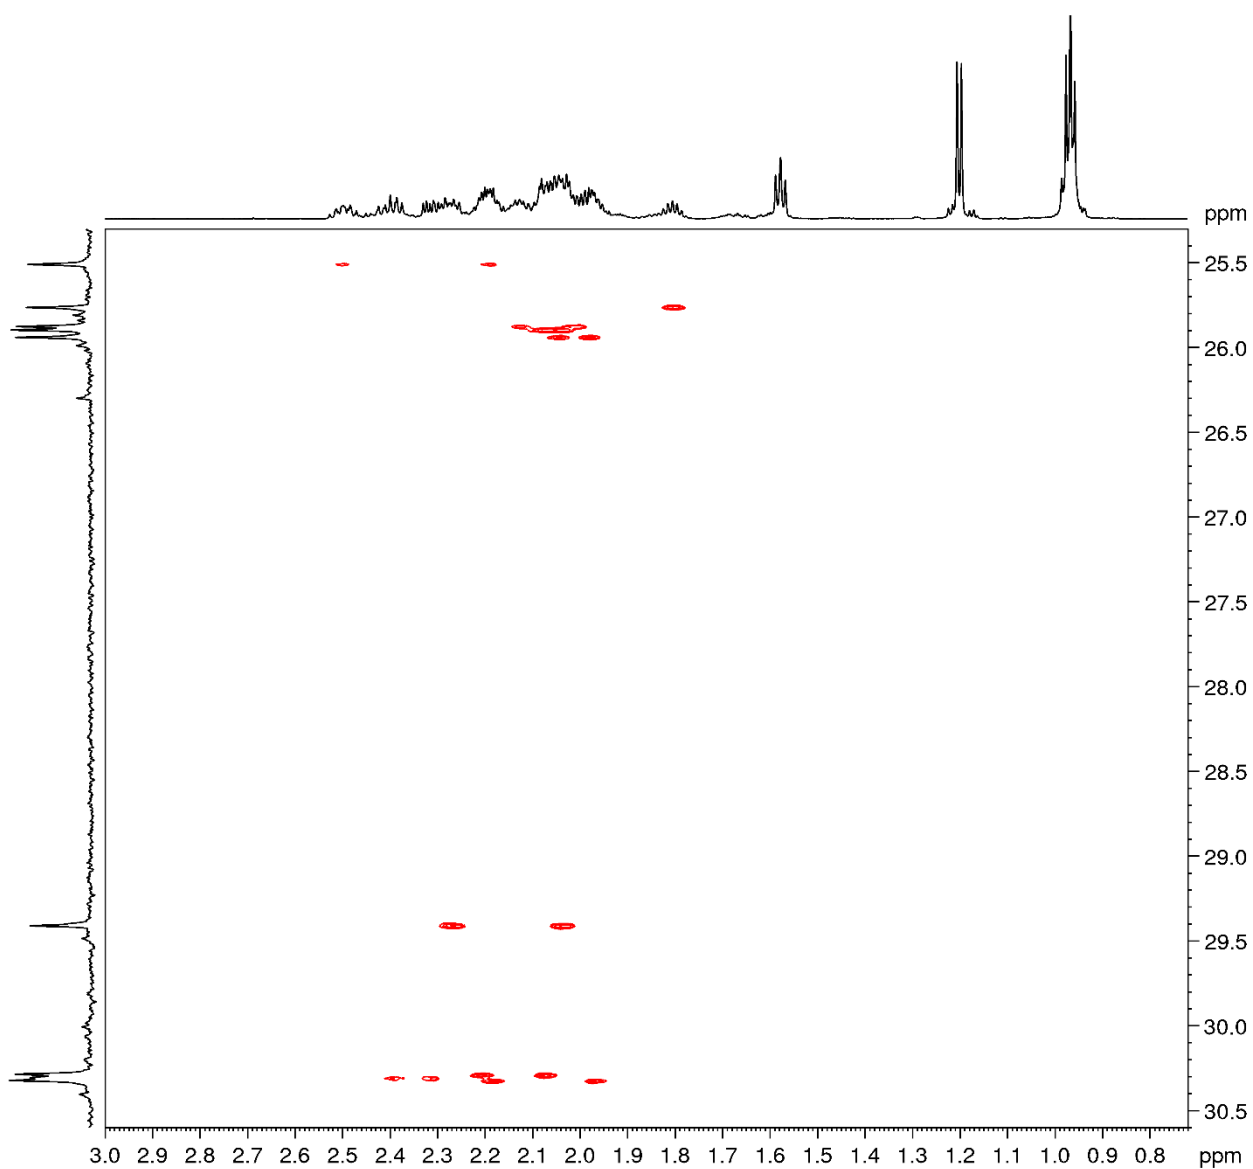

**Figure S9.** Band-selective HMBC spectrum of compound **1** (700 MHz,  $\text{CD}_3\text{OD}$ ).

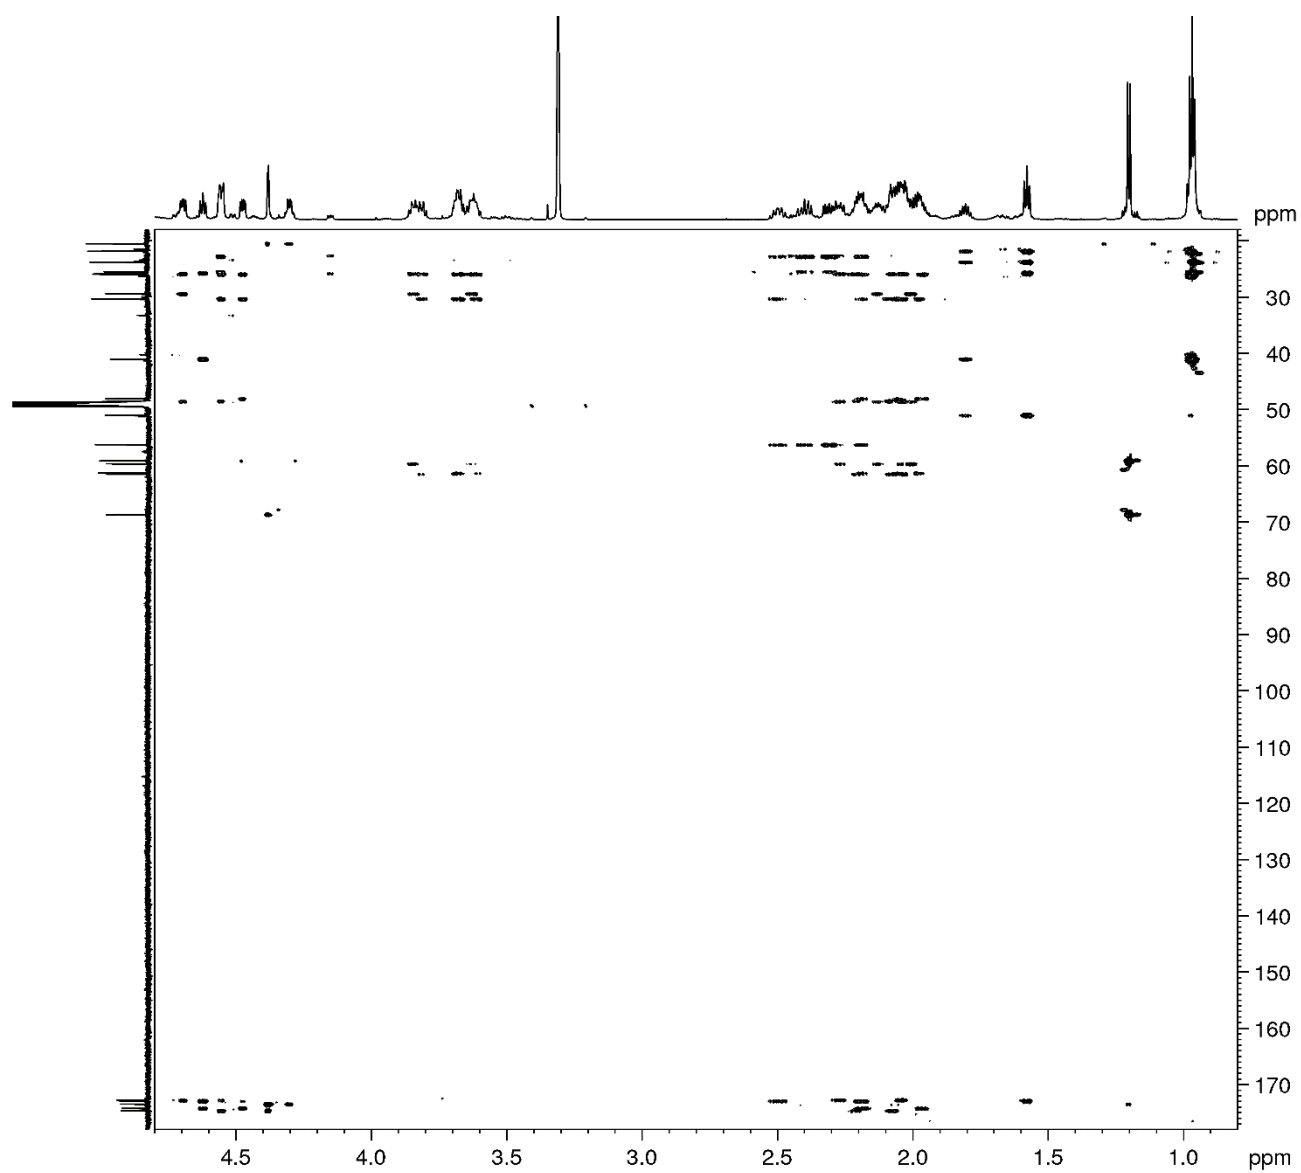

**Figure S10.** HMBC spectrum of compound **1** (700 MHz, CD<sub>3</sub>OD).

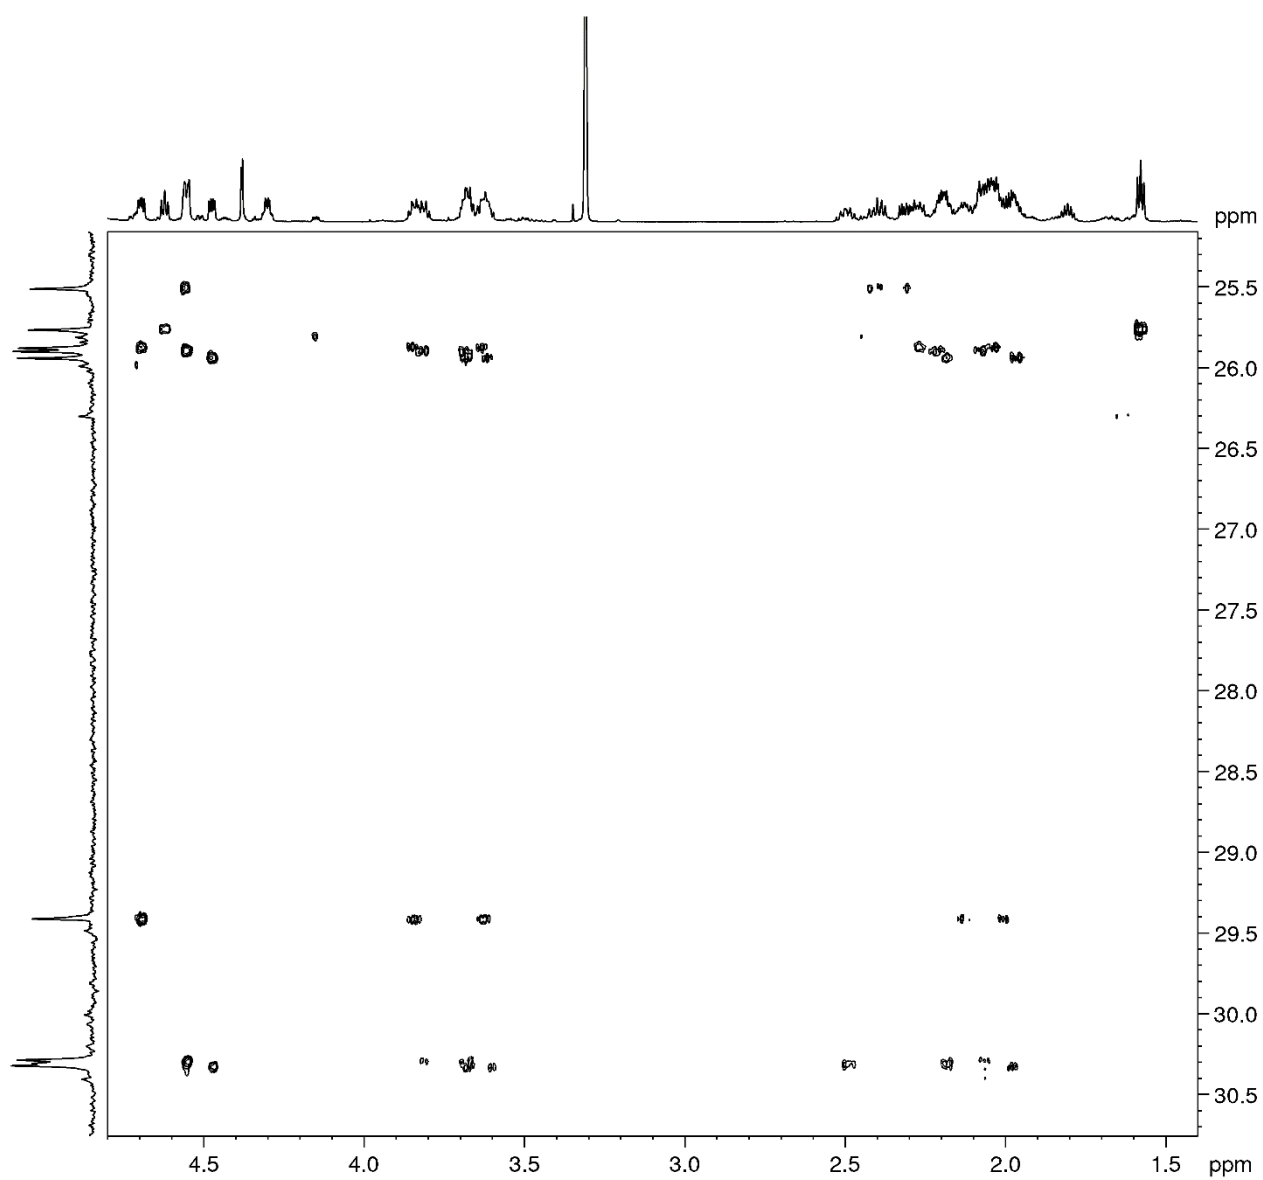

**Figure S11.** Band-selective HMBC spectrum of compound **1** (700 MHz, CD<sub>3</sub>OD).

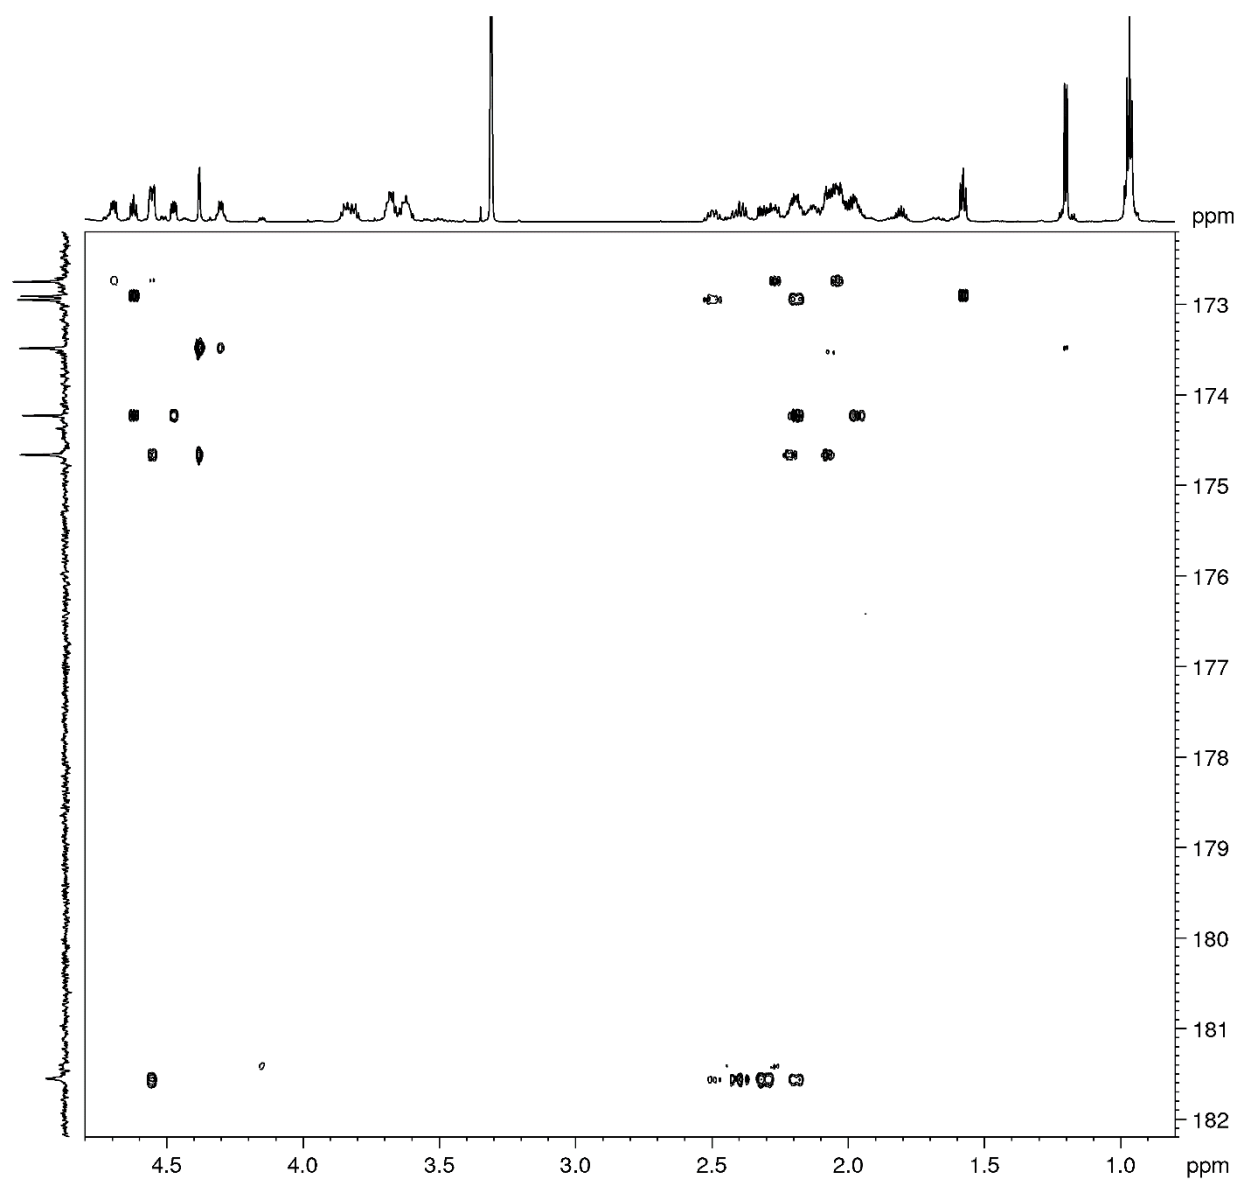

**Figure S12.** Band-selective HMBC spectrum of compound **1** (700 MHz, CD<sub>3</sub>OD).

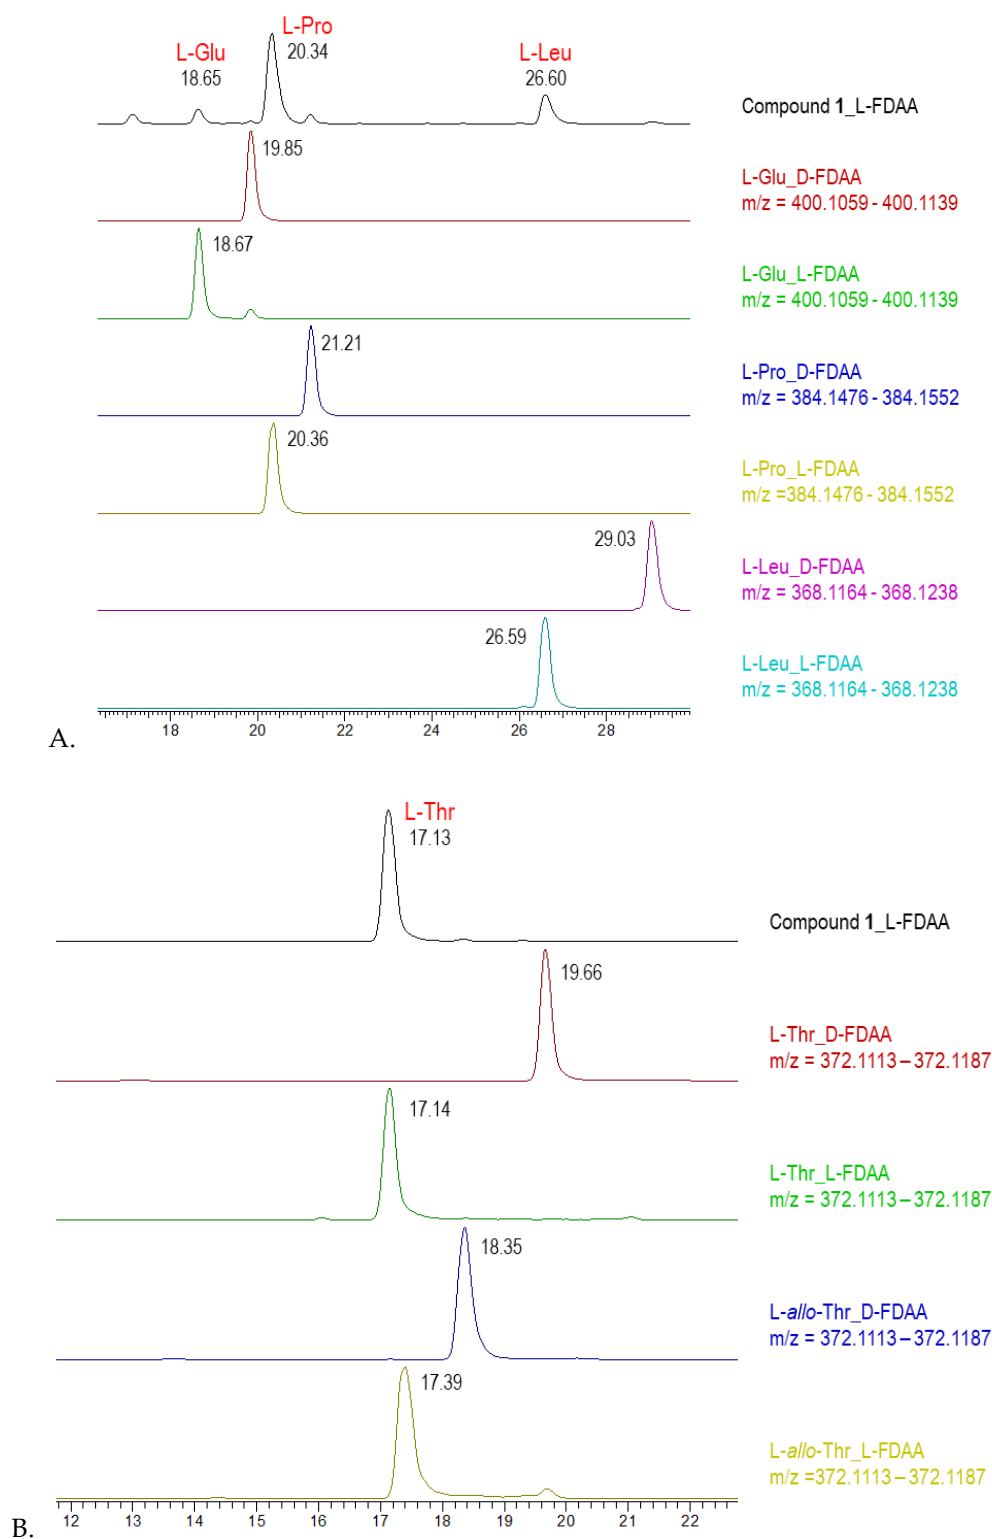

**Figure S13.** Advanced Marfey's analysis of compound **1**. Extracted-ion chromatograms at  $m/z$  400.1099, at  $m/z$  368.1201 and at  $m/z$  384.1514 of the L-FDAA derivatives from the hydrolysis of **1** and of D- and L-FDAA derivatives L-Glu, L-Pro and L-Leu. (B) Extracted-ion chromatograms at  $m/z$  372.1150 of the L-FDAA derivatives from the hydrolysis of **1** and of D- and L-FDAA derivatives L-Thr and L-*allo*-Thr.

**Table S2.** Full NMR data of compound **2** ( $^1\text{H}$  600 MHz,  $^{13}\text{C}$  175 MHz,  $\text{CD}_3\text{OD}$ ).

| AA                       | pos. | $\delta_{\text{C}}$ , type | $\delta_{\text{H}}$ , mult ( <i>J</i> in Hz) | HMBC                                           |
|--------------------------|------|----------------------------|----------------------------------------------|------------------------------------------------|
| <b>pGlu</b>              | NH   |                            |                                              |                                                |
|                          | 1    | 172.99, C                  |                                              |                                                |
|                          | 2    | 56.25, CH                  | 4.56, dd (4.2, 8.8)                          | pGlu-5                                         |
|                          | 3    | 25.58, CH <sub>2</sub>     | a 2.50, m<br>b 2.19, m                       | pGlu-1, pGlu-5<br>pGlu-1, pGlu-5               |
|                          | 4    | 30.38, CH <sub>2</sub>     | a 2.40, m<br>b 2.31, m                       | pGlu-5<br>pGlu-5                               |
| <b>Pro<sup>I</sup></b>   | 5    | 181.55, C                  |                                              |                                                |
|                          | 1    | 174.5, C                   |                                              |                                                |
|                          | 2    | 61.37, CH                  | 4.49, dd (4.3, 8.5)                          | Pro <sup>I</sup> -1                            |
|                          | 3    | 30.36, CH <sub>2</sub>     | a 2.18, m<br>b 1.97, m                       | Pro <sup>I</sup> -1<br>Pro <sup>I</sup> -1     |
|                          | 4    | 25.94, CH <sub>2</sub>     | a 2.03, m<br>b 1.98, m                       |                                                |
| <b>Leu</b>               | 5    | 48.06, CH <sub>2</sub>     | a 3.68, m<br>b 3.61, m                       |                                                |
|                          | NH   |                            |                                              |                                                |
|                          | 1    | 173.03, C                  |                                              |                                                |
|                          | 2    | 51.14, CH                  | 4.62, t (7.2)                                | Leu-1, Pro <sup>I</sup> -1                     |
|                          | 3    | 41.12, CH <sub>2</sub>     | 1.57, t (7.2)                                | Leu-1                                          |
| <b>Pro<sup>II</sup></b>  | 4    | 25.86, CH                  | 1.81, nonet (6.6)                            |                                                |
|                          | 5    | 21.92, CH <sub>3</sub>     | 0.96, d (6.6)                                |                                                |
|                          | 1    | 172.70, C                  |                                              |                                                |
|                          | 2    | 59.67, CH                  | 4.69 dd (4.5, 8.3)                           | Leu-1, Pro <sup>II</sup> -1                    |
|                          | 3    | 29.19, CH <sub>2</sub>     | a 2.27, m<br>b 1.98, m                       | Pro <sup>II</sup> -1<br>Pro <sup>II</sup> -1   |
| <b>Pro<sup>III</sup></b> | 4    | 25.87, CH <sub>2</sub>     | a 2.13, m<br>b 2.01, m                       |                                                |
|                          | 5    | 48.62, CH <sub>2</sub>     | a 3.84, m<br>b 3.65, m                       |                                                |
|                          | 1    | 175.46, C                  |                                              |                                                |
|                          | 2    | 60.35, CH                  | 4.44, m                                      | Pro <sup>II</sup> -1, Pro <sup>III</sup> -1    |
|                          | 3    | 30.08, CH <sub>2</sub>     | a 2.25, m<br>b 2.00, m                       | Pro <sup>III</sup> -1<br>Pro <sup>III</sup> -1 |
|                          | 4    | 25.90, CH <sub>2</sub>     | a 2.07, m<br>b 2.04, m                       |                                                |
|                          | 5    | 48.50, CH <sub>2</sub>     | a 3.80, m<br>b 3.63, m                       |                                                |



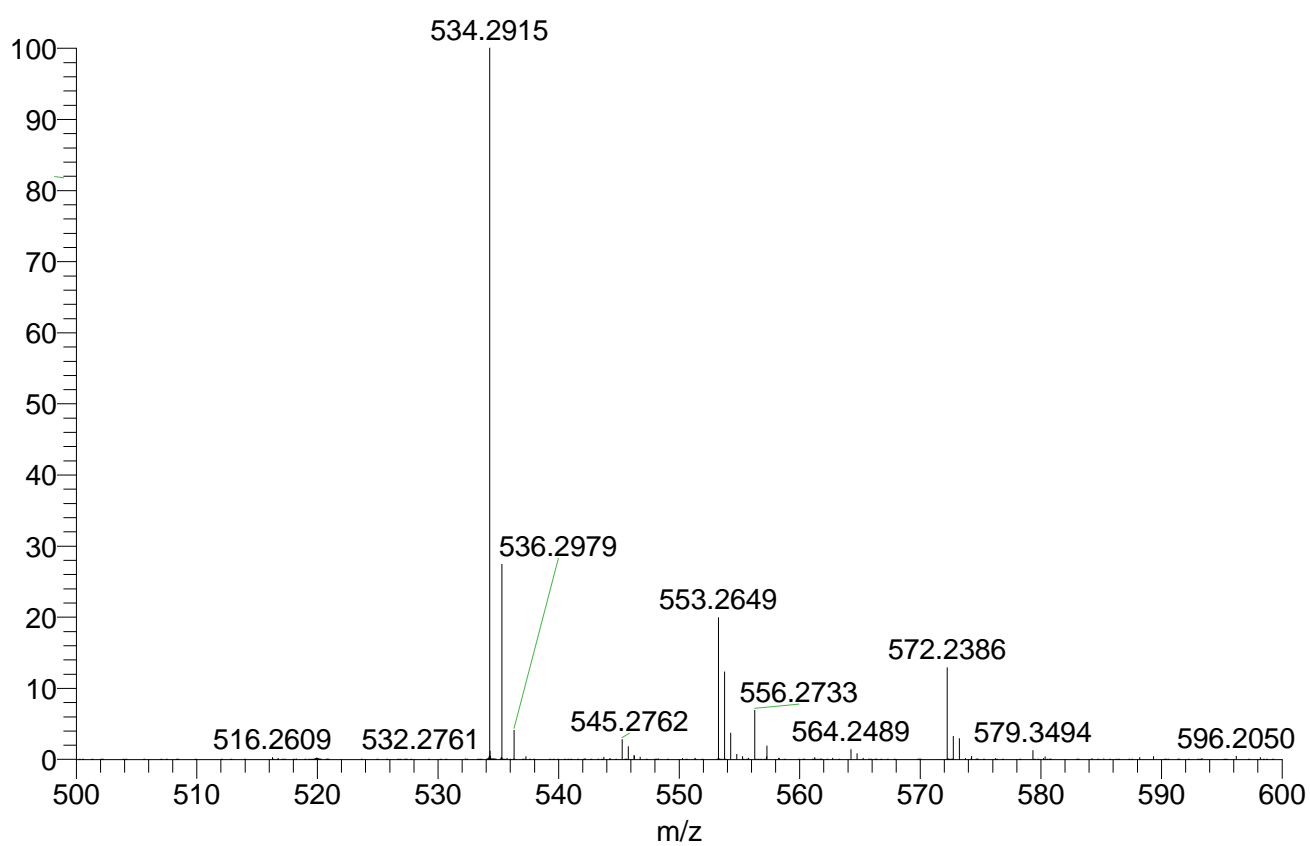

**Figure S14.** Positive ion mode HR-ESI mass spectrum of compound 2.

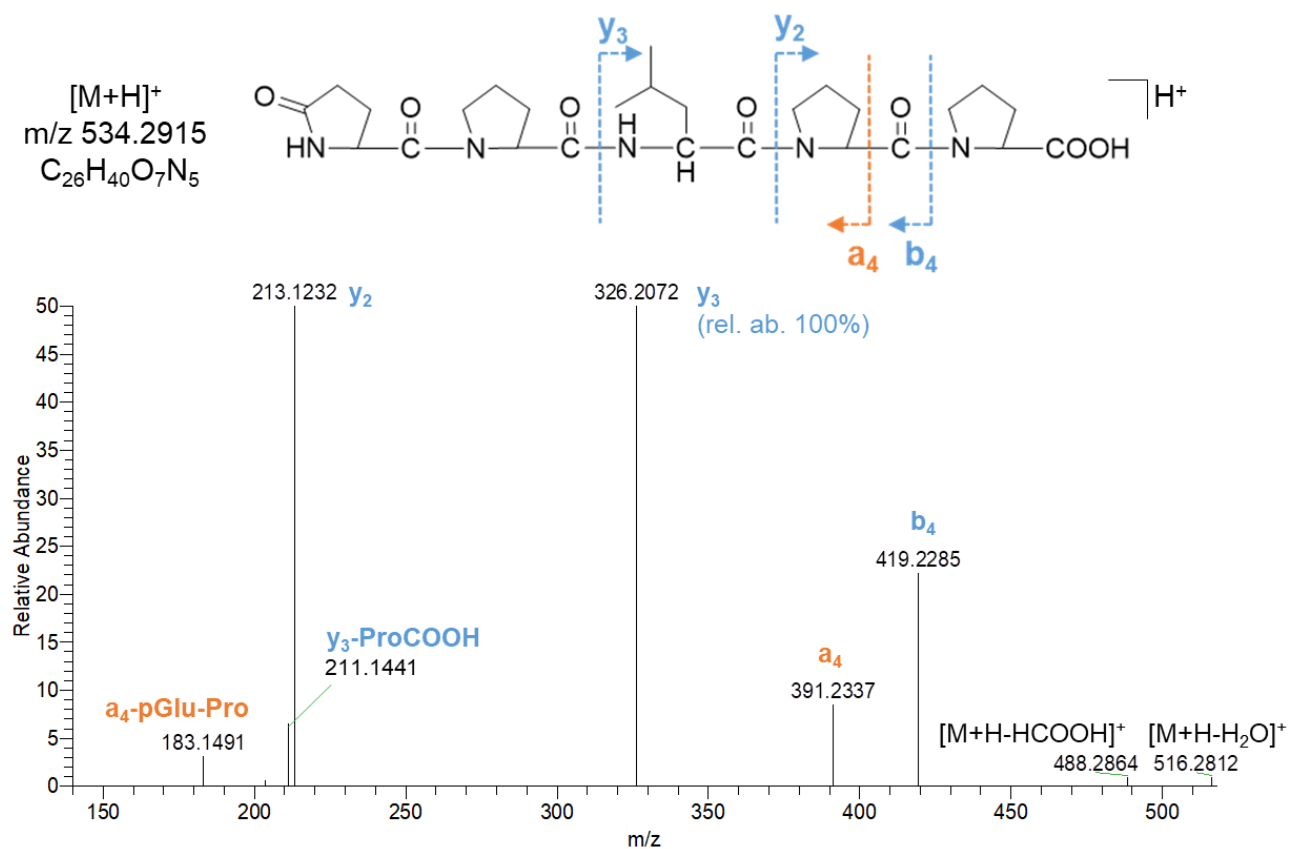

Figure S15. HR-MS/MS spectrum of the  $[M+H]^+$  pseudomolecular ion of compound 2.

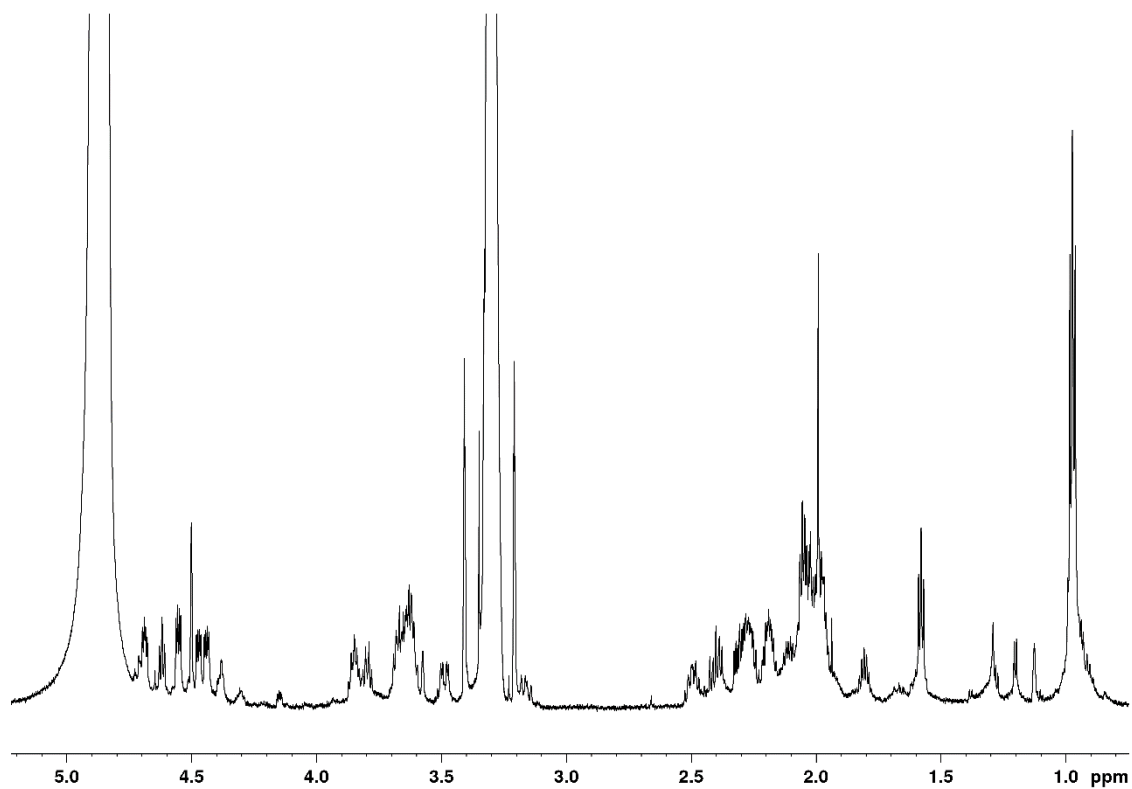

**Figure S16.**  $^1\text{H}$ -NMR spectrum of compound 2 (700 MHz,  $\text{CD}_3\text{OD}$ ).

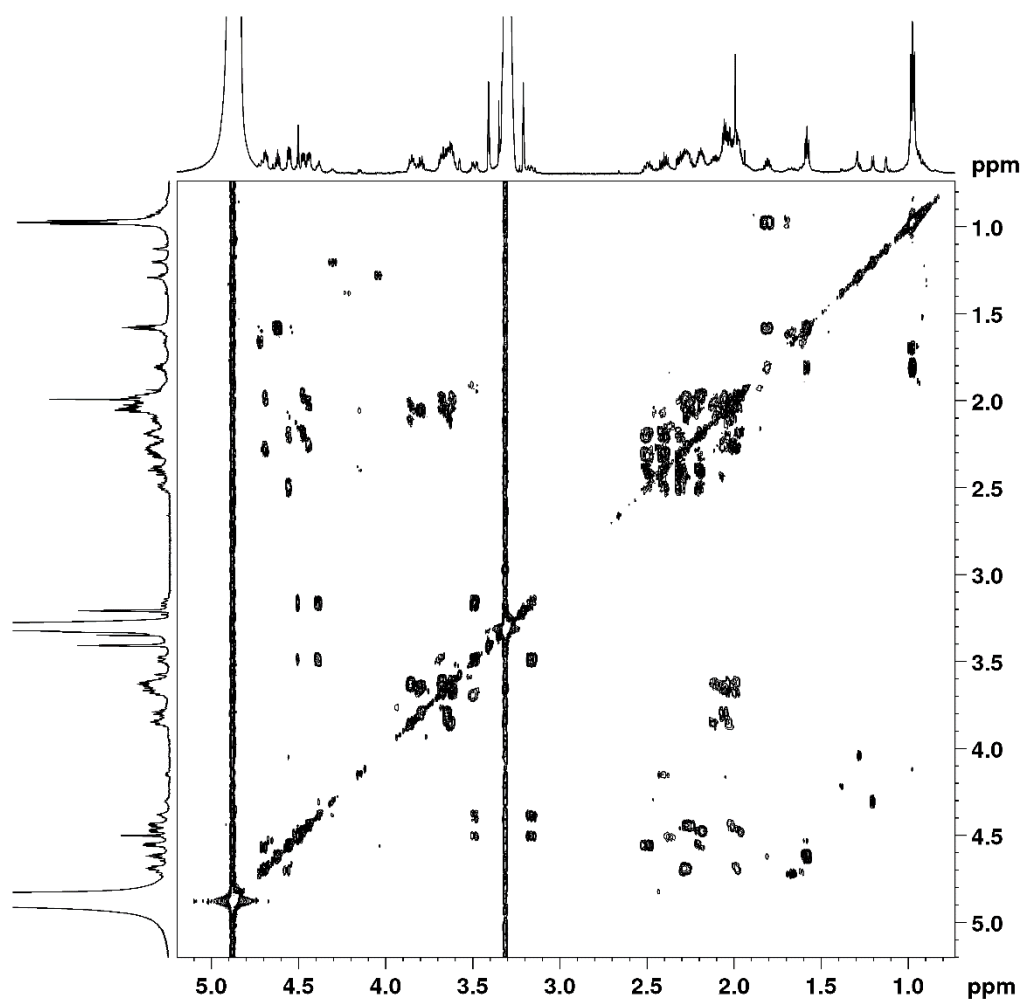

Figure S17. COSY spectrum of compound 2 (700 MHz, CD<sub>3</sub>OD).

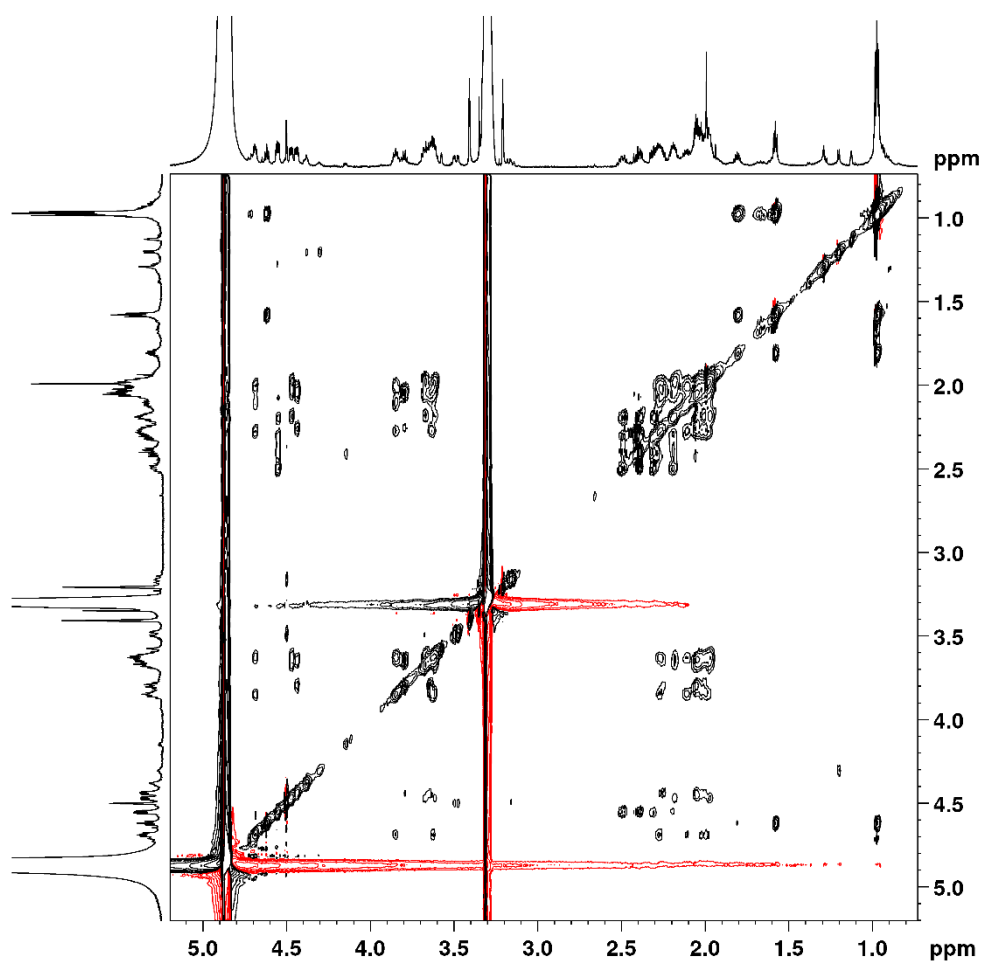

**Figure S18.** TOCSY spectrum of compound 2 (700 MHz, CD<sub>3</sub>OD).

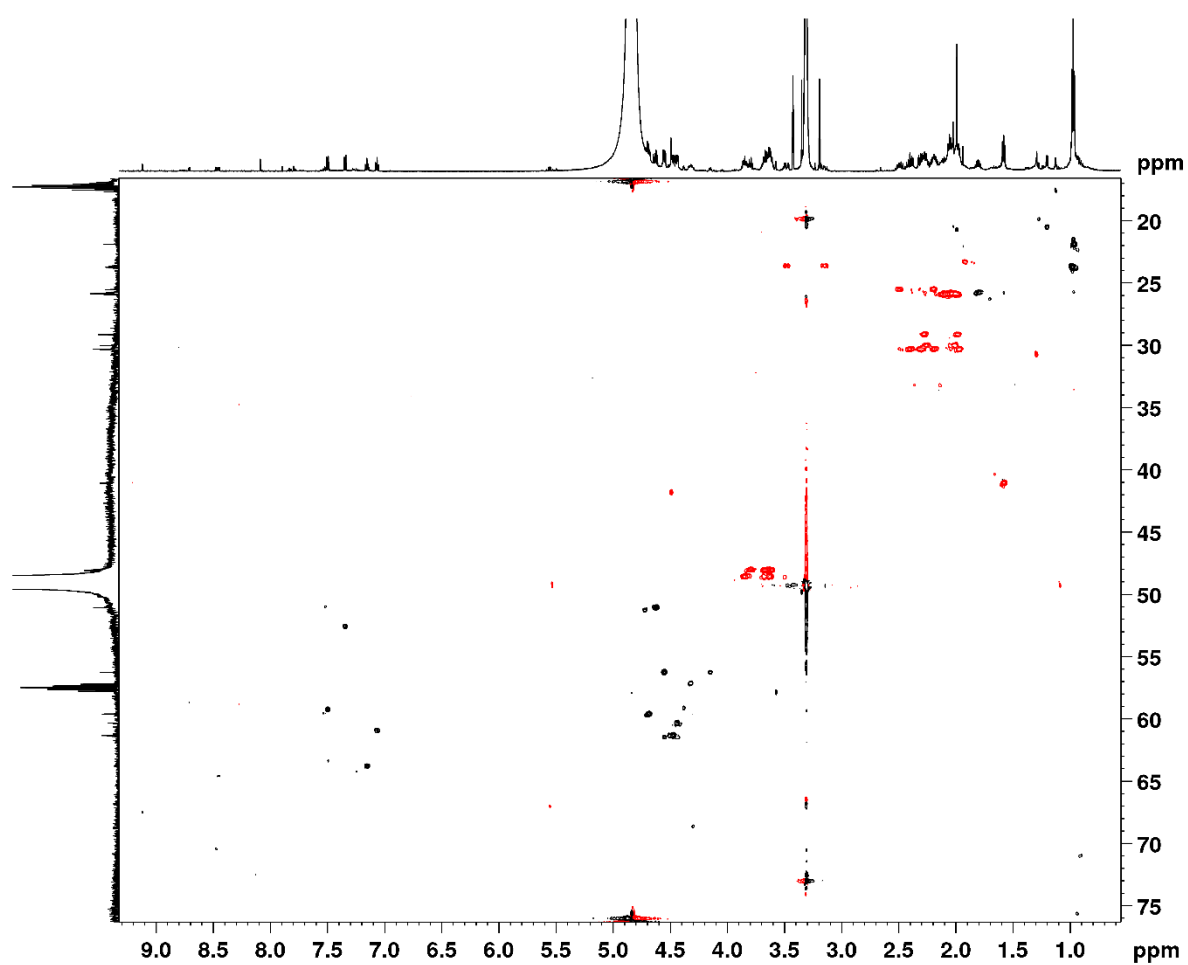

**Figure S19.** HSQC spectrum of compound 2 (600 MHz,  $\text{CD}_3\text{OD}$ ).

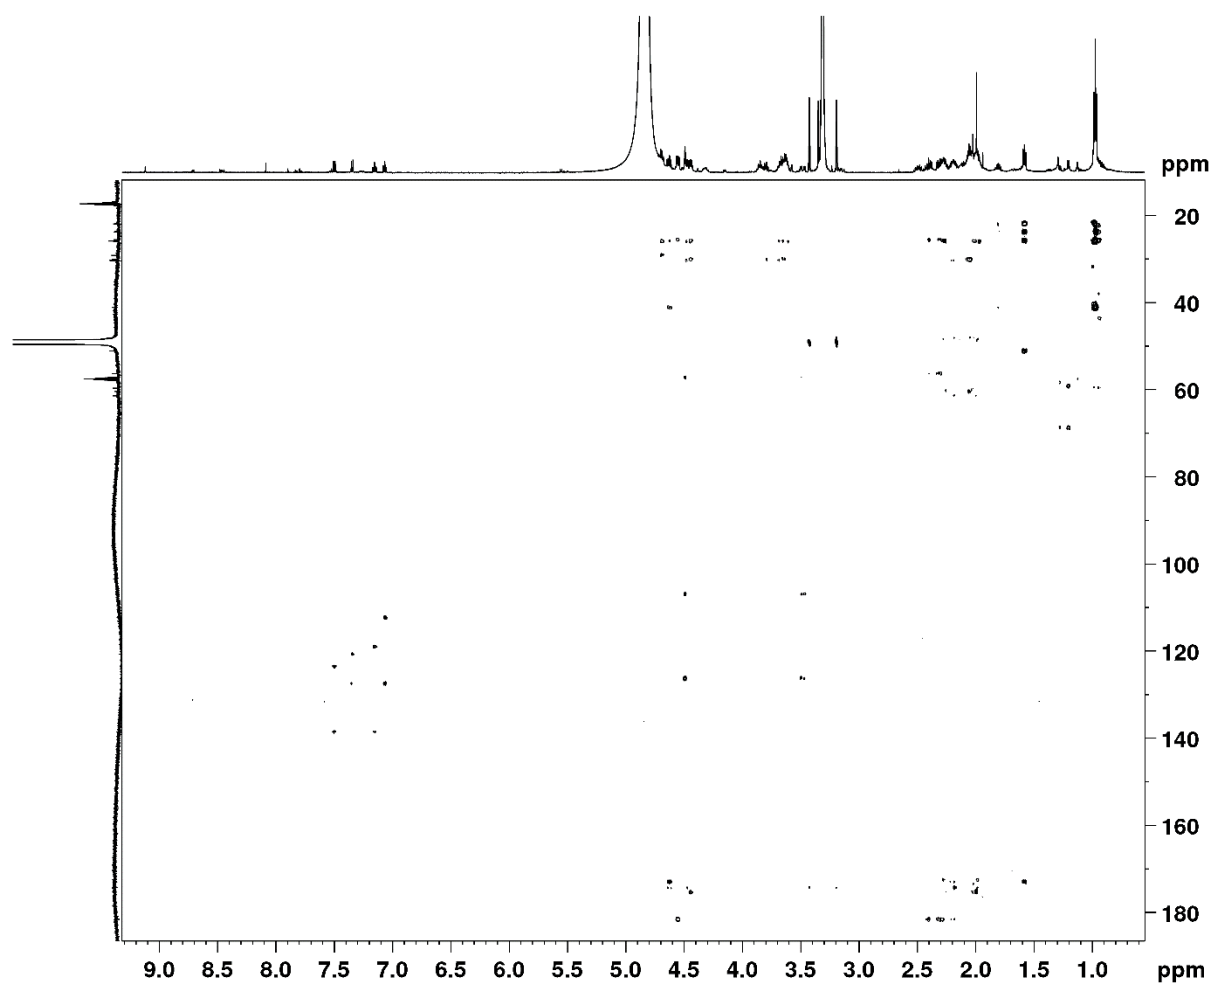

**Figure S20.** HMBC spectrum of compound 2 (600 MHz, CD<sub>3</sub>OD).

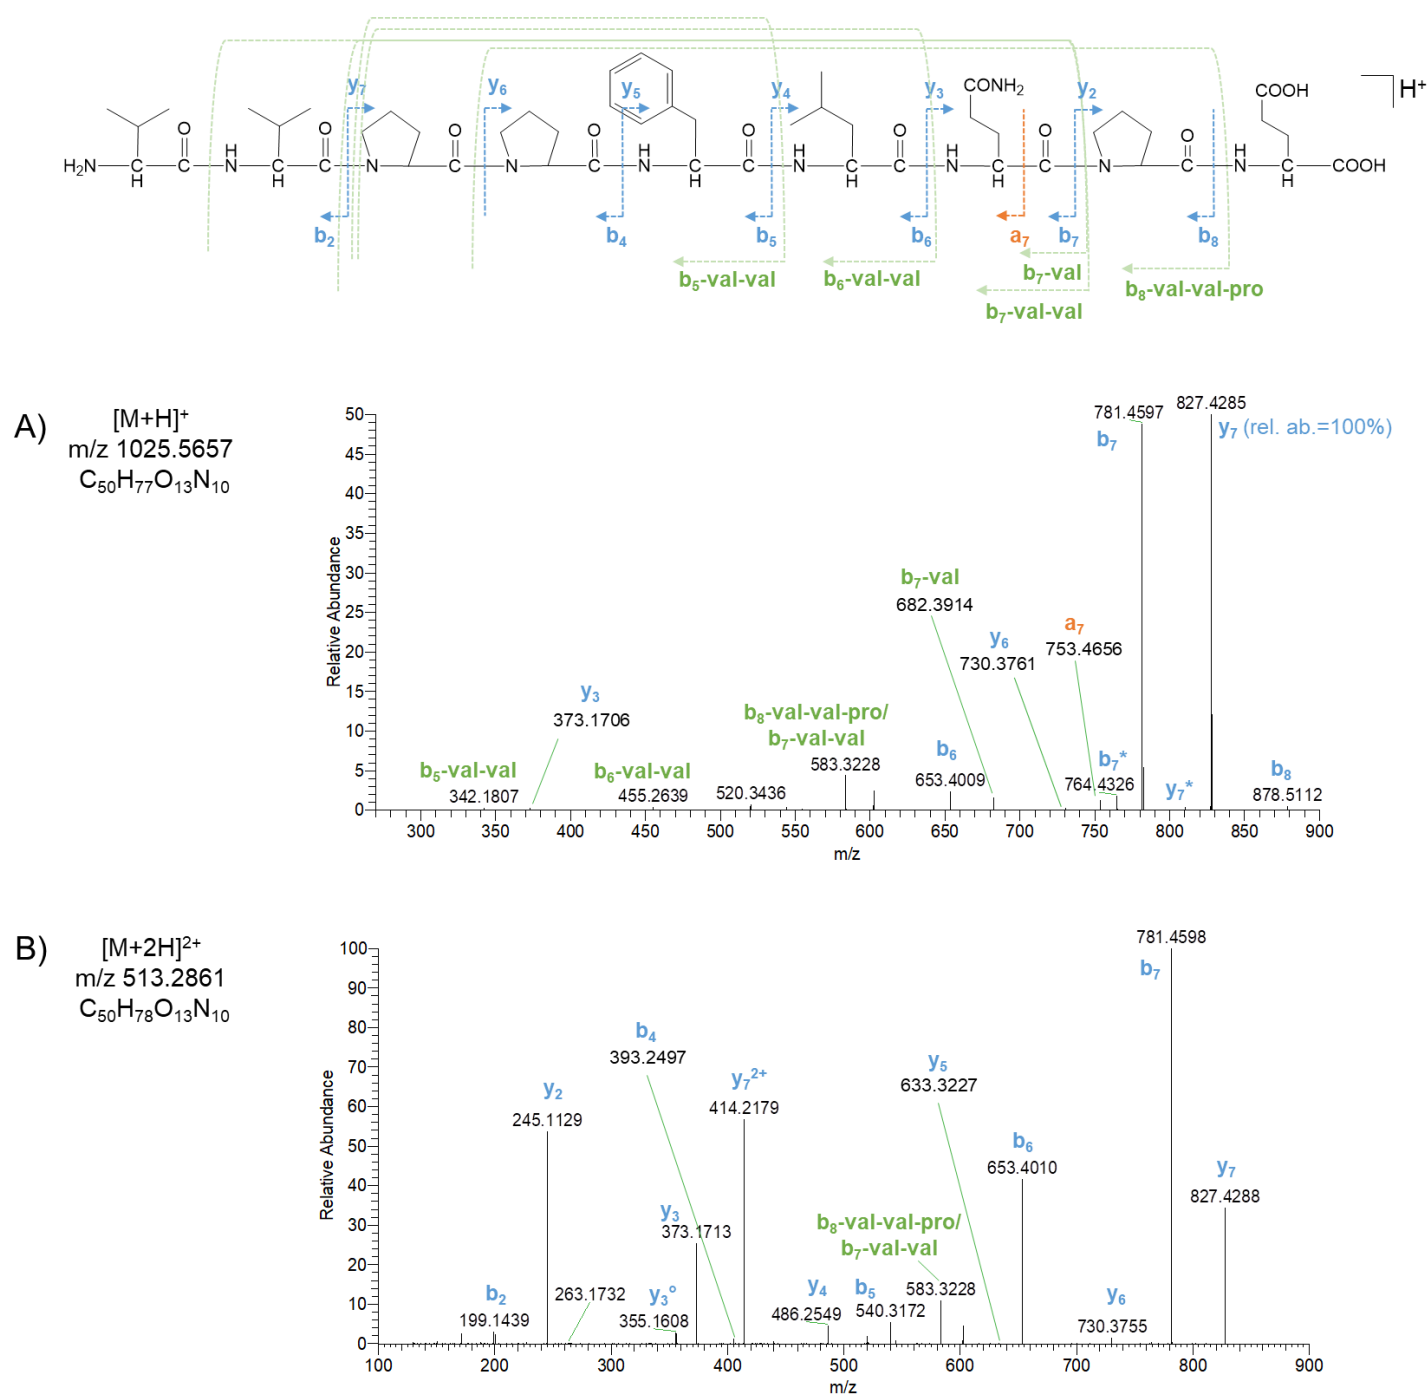

**Figure S21.** HR-MS/MS spectrum of the  $[M+H]^+$  and  $[M+2H]^{2+}$  ions of compound 3 ( $R_t = 17.3$  min). Ions marked with a circle ( $^\circ$ ) derive from the corresponding fragment after water loss; ions marked with an asterisk ( $^*$ ) derive from the corresponding fragment after  $NH_3$  loss.



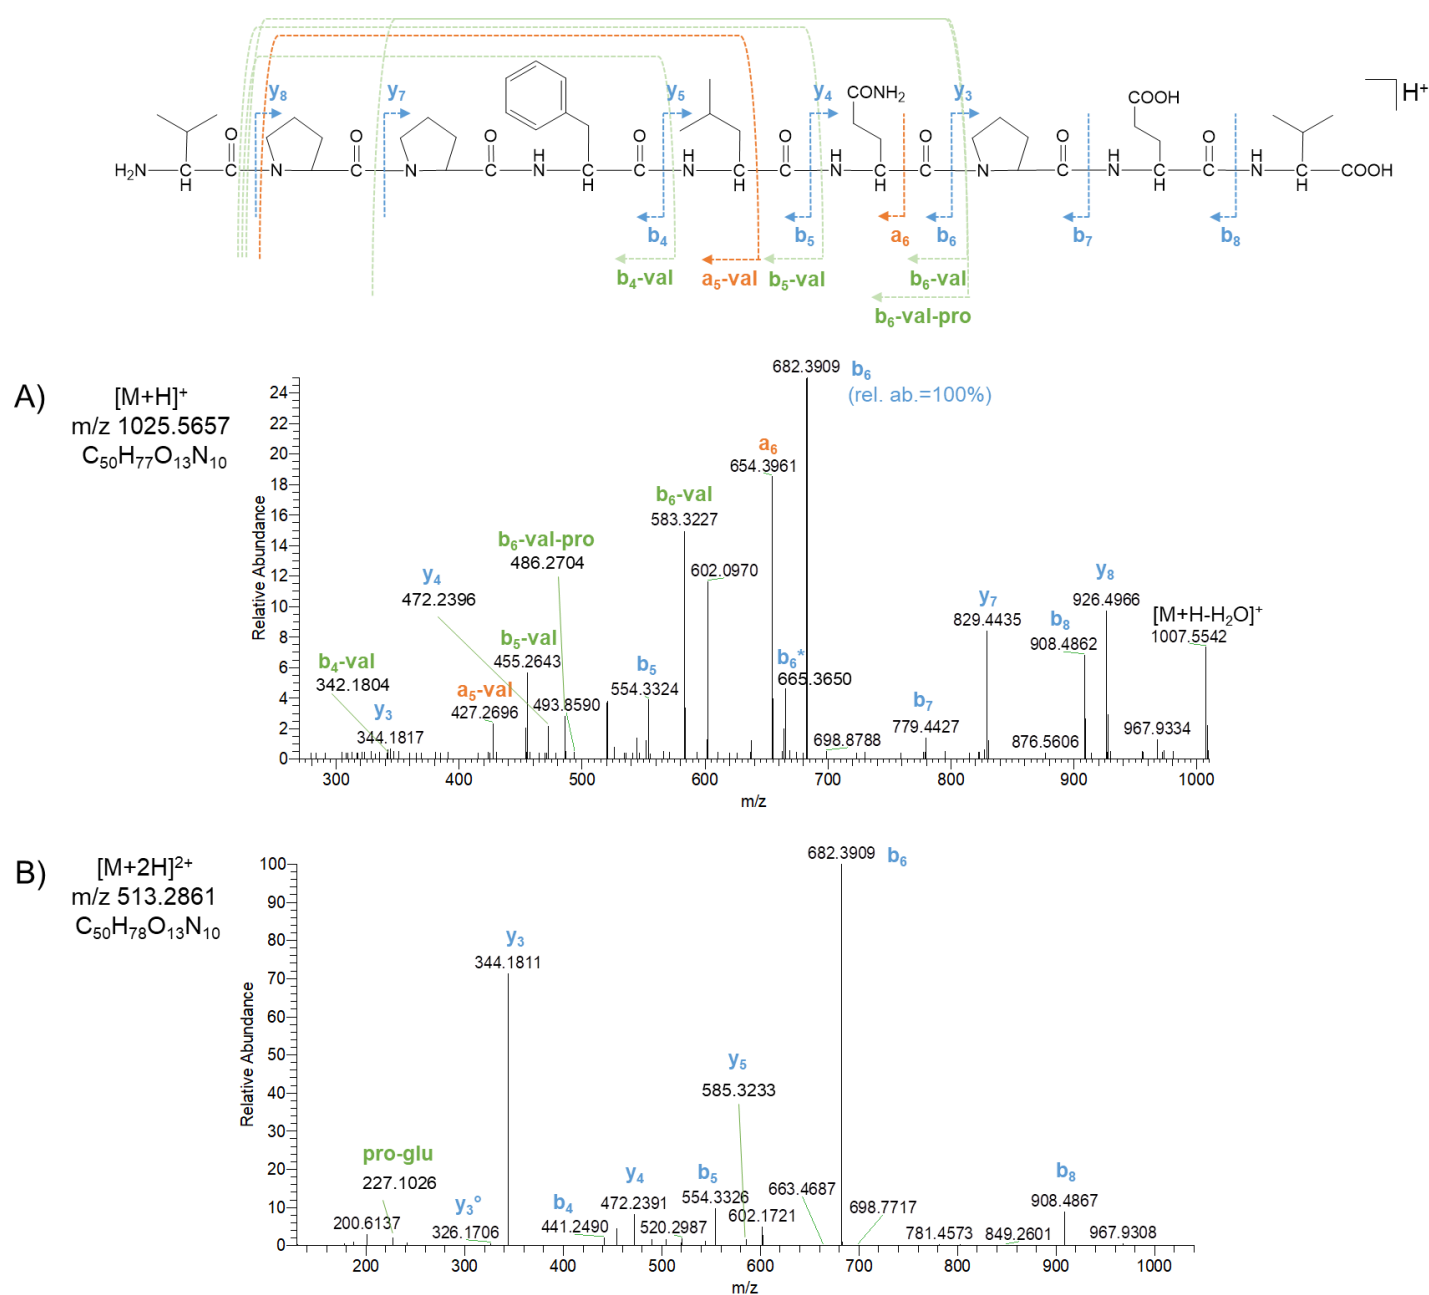

**Figure S22.** HR-MS/MS spectrum of the  $[M+H]^+$  and  $[M+2H]^{2+}$  ions of compound 4 ( $R_t$  = 18.4 min). Ions marked with a circle ( $^\circ$ ) derive from the corresponding fragment after water loss; ions marked with an asterisk ( $^*$ ) derive from the corresponding fragment after  $NH_3$  loss.

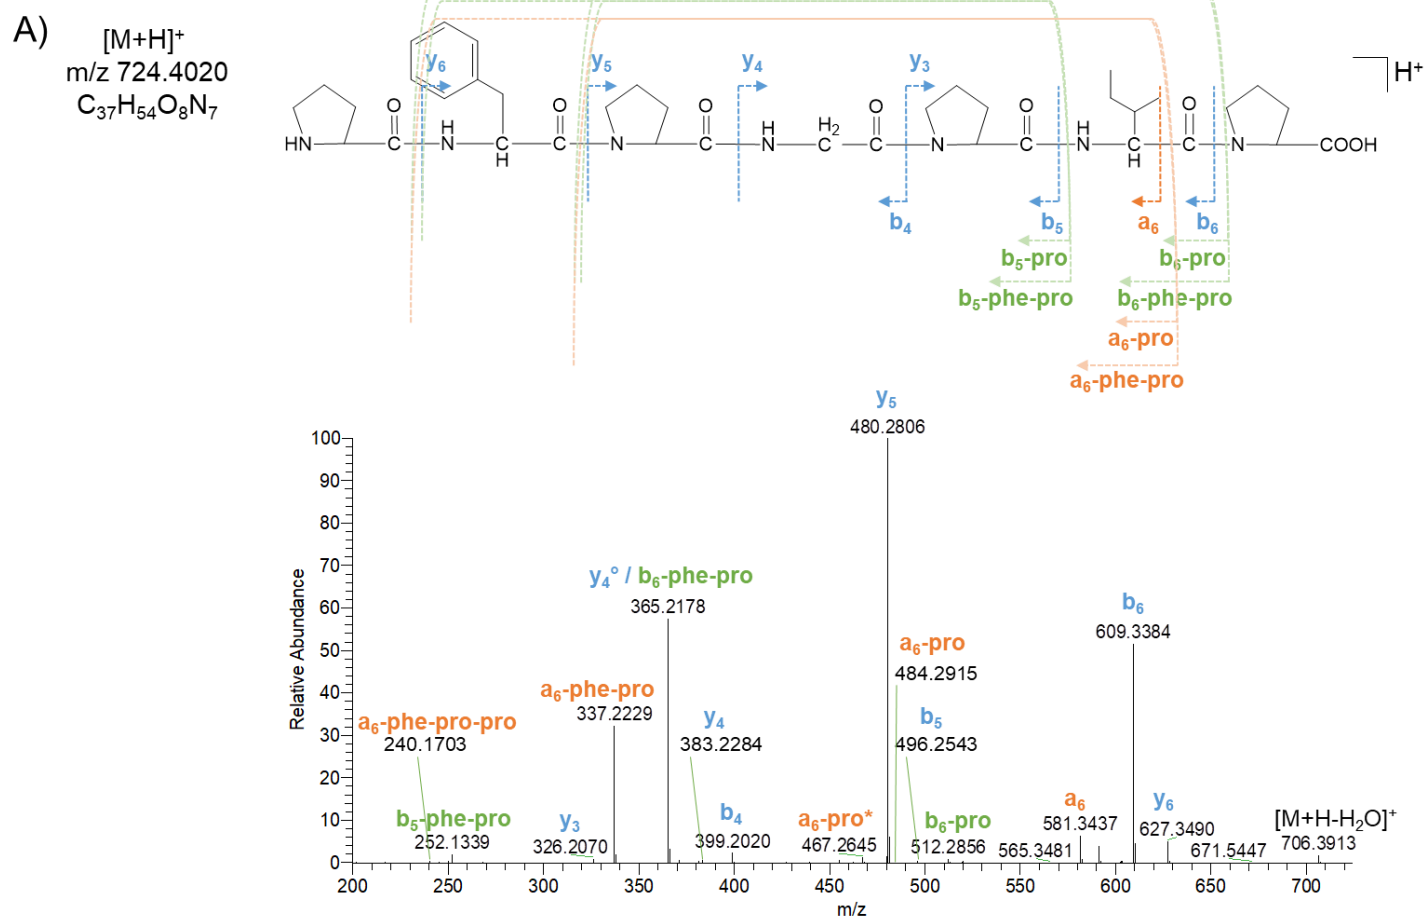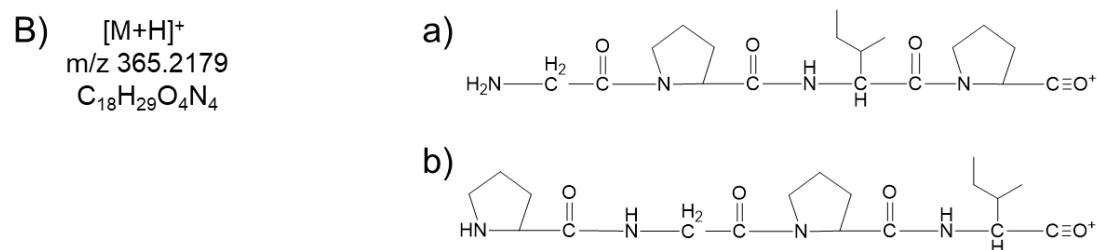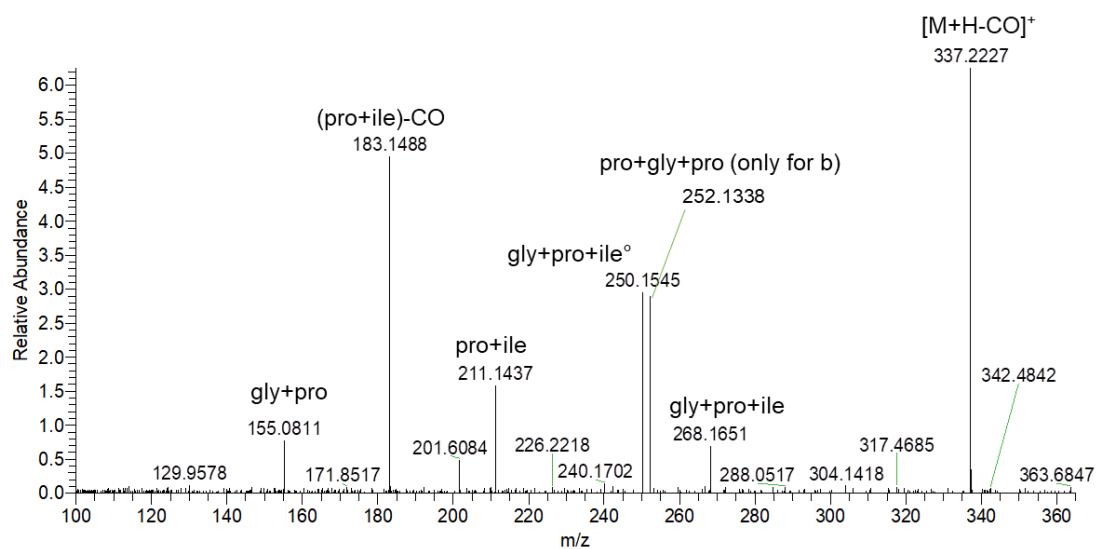

**Figure S23.** (A) HR-MS/MS spectrum of the  $[M+H]^+$  pseudomolecular ion of compound 5 ( $R_t = 17.4$  min). (B) HR-MS<sup>3</sup> spectrum of the fragment ions a) and b) at  $m/z$  365.2179 arising from fragmentation of compound 5. Ions marked with a circle (°) derive from the corresponding fragment after water loss; ions marked with an asterisk (\*) derive from the corresponding fragment after  $NH_3$  loss.

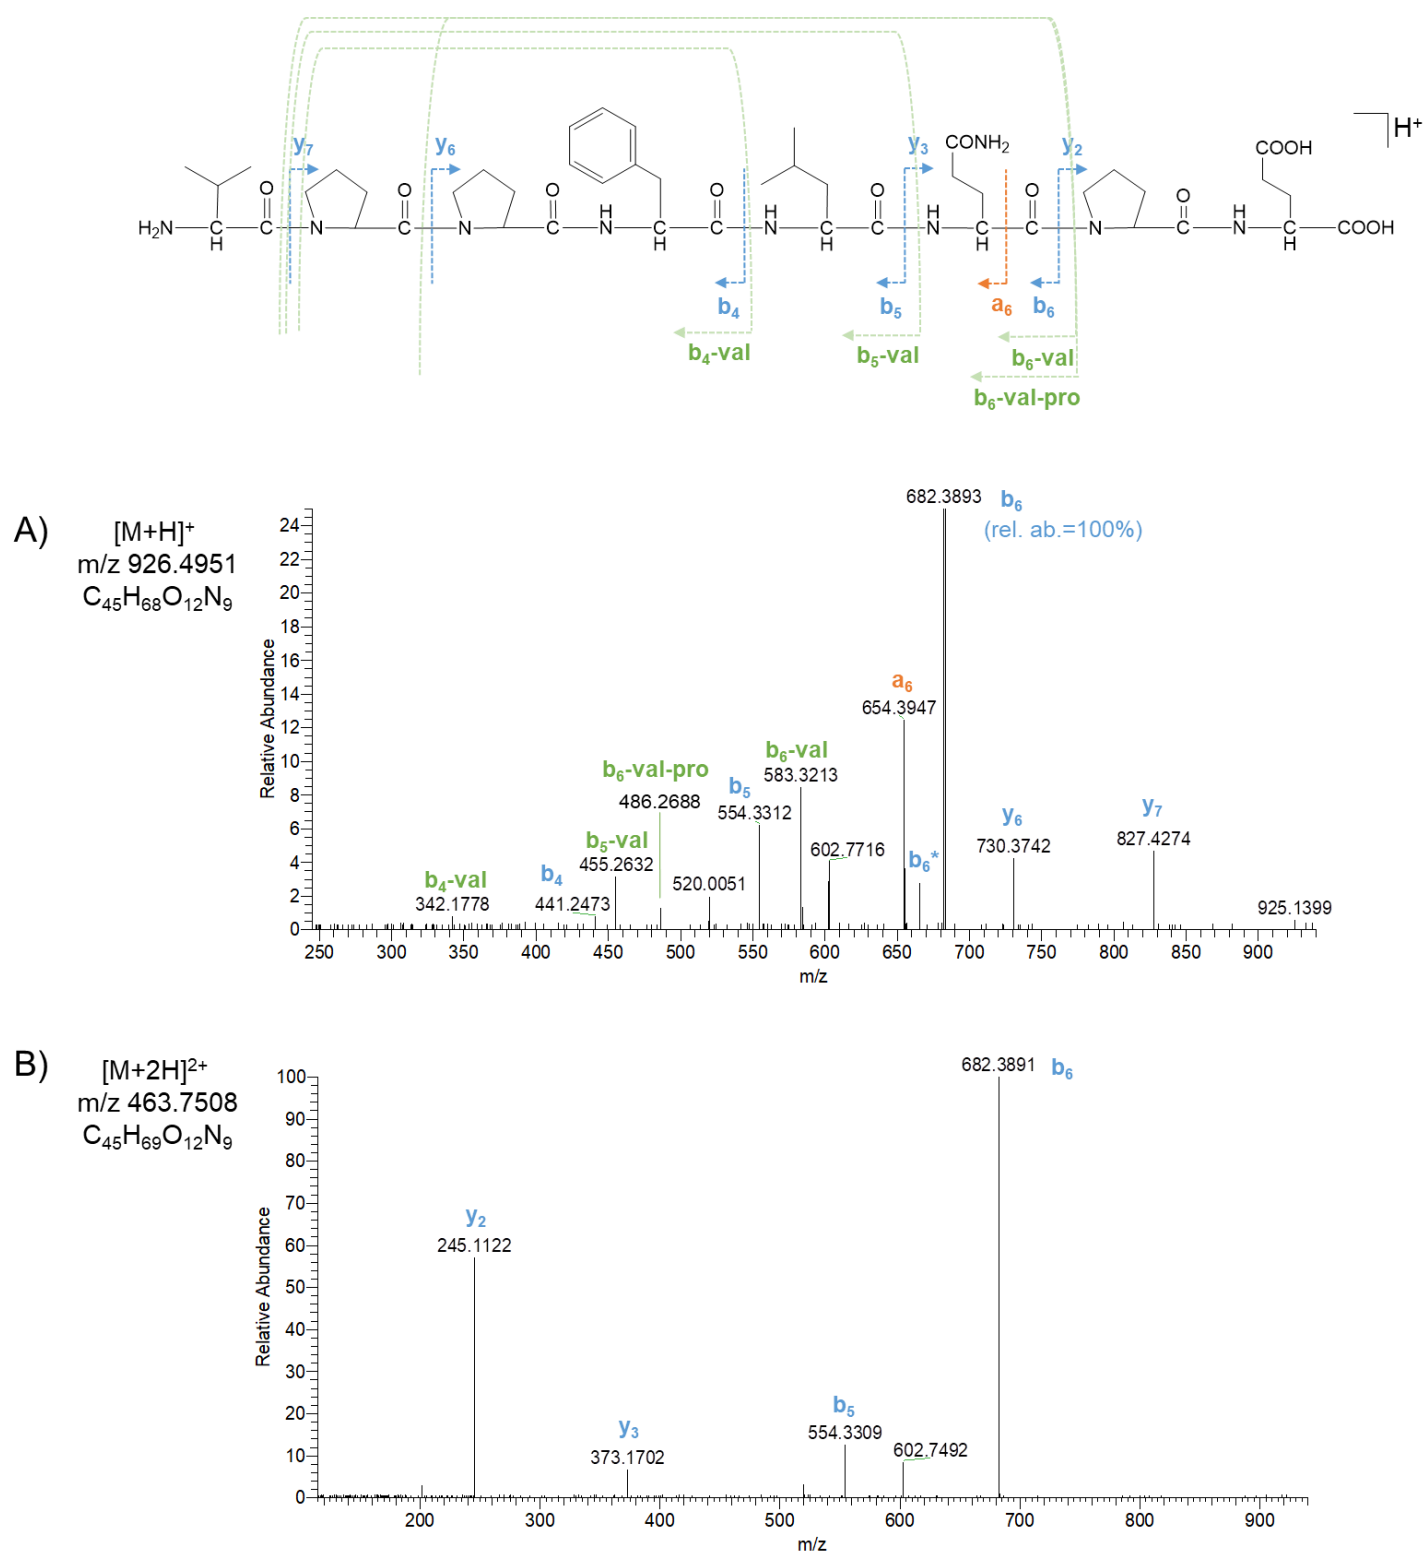

**Figure S24.** HR-MS/MS spectrum of the  $[M+H]^+$  and  $[M+2H]^{2+}$  ions of compound **6** ( $R_t = 16.0$  min). Ions marked with a circle ( $^\circ$ ) derive from the corresponding fragment after water loss; ions marked with an asterisk (\*) derive from the corresponding fragment after  $NH_3$  loss.

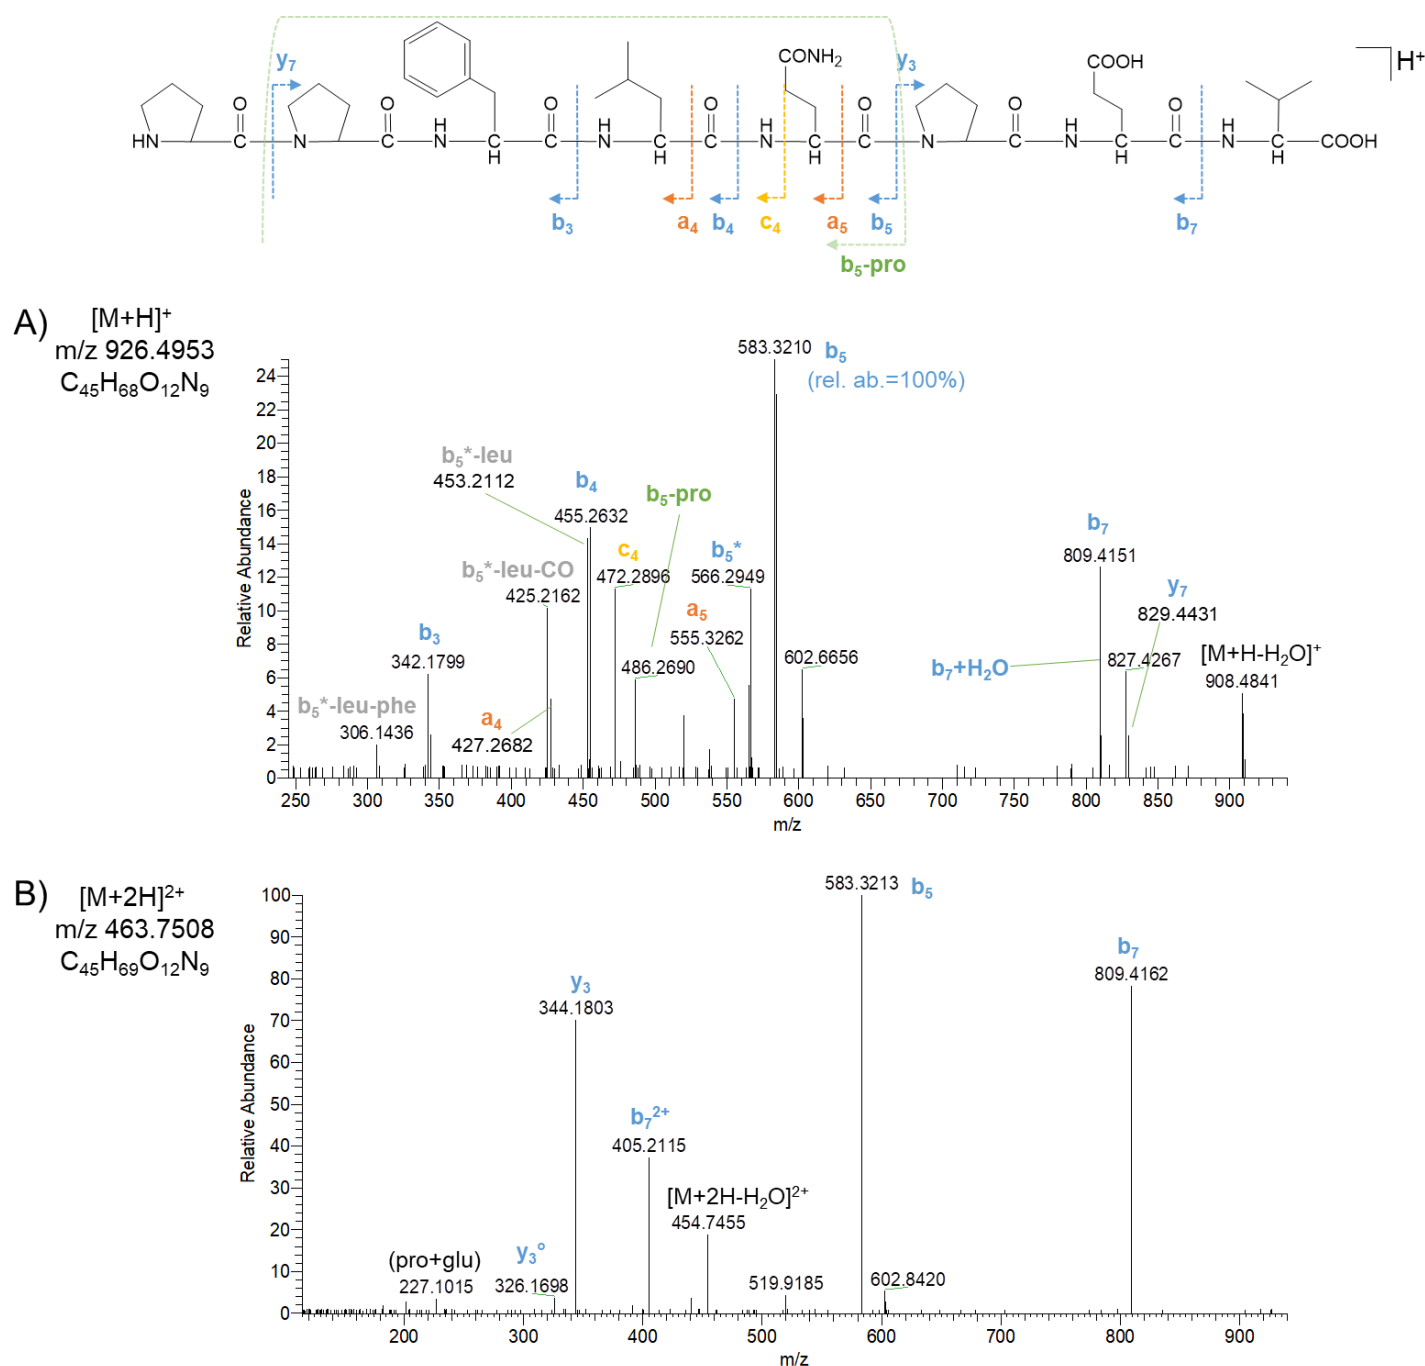

**Figure S25.** HR-MS/MS spectrum of the  $[M+H]^+$  and  $[M+2H]^{2+}$  ions of compound **7** ( $R_t = 17.0$  min). The  $b_5^*$  ion (A) is expected to form a macrocyclic intermediate, presumably deriving from head-to-side chain cyclization between the N-terminal Pro and the Gln side chain, with concomitant  $NH_3$  loss. This intermediate functions as a precursor to the formation of non-native, or scrambled, product ions (highlighted in grey). Ions marked with a circle ( $^\circ$ ) derive from the

corresponding fragment after water loss; ions marked with an asterisk (\*) derive from the corresponding fragment after  $\text{NH}_3$  loss.

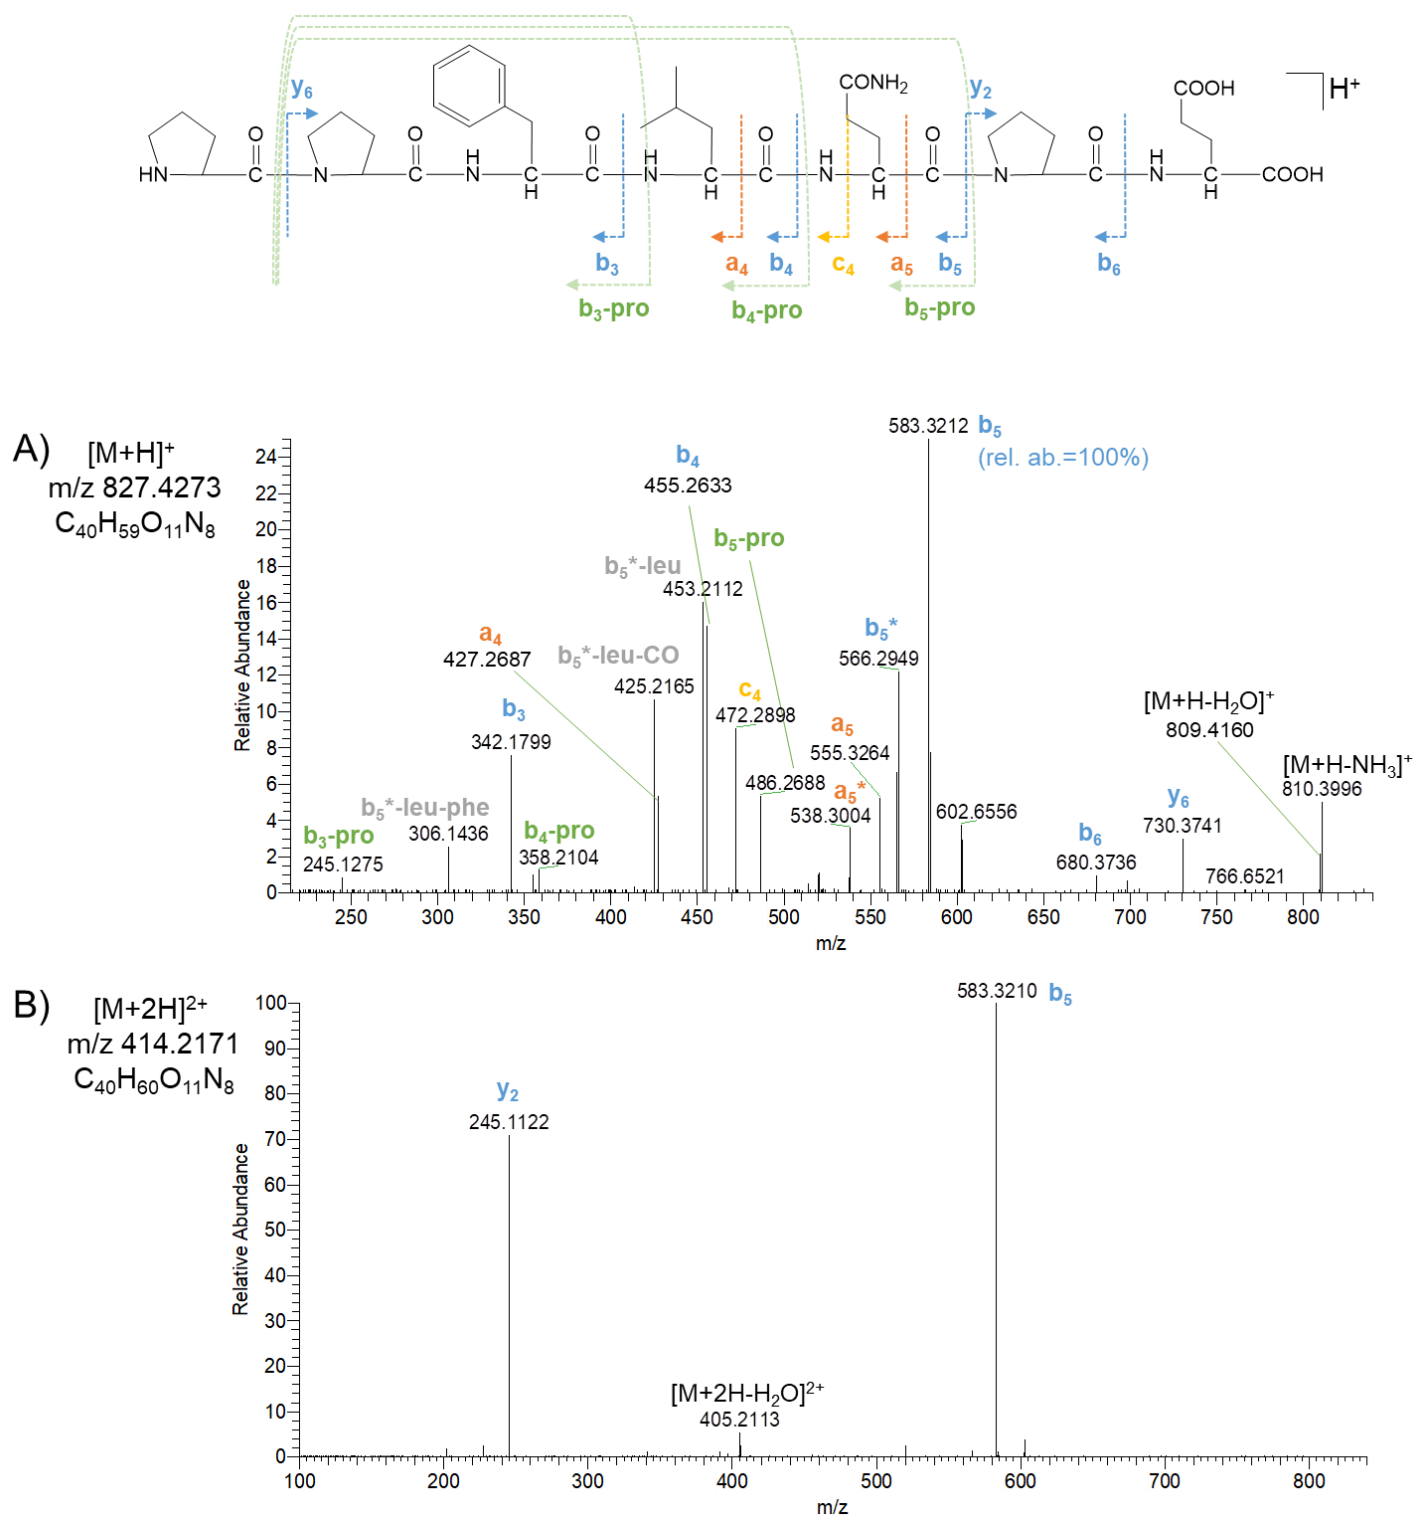

**Figure S26.** HR-MS/MS spectrum of the  $[\text{M}+\text{H}]^+$  and  $[\text{M}+2\text{H}]^{2+}$  ions of compound **8** ( $R_t = 14.2$  min). The  $b_5^*$  ion (A) is expected to form a macrocyclic intermediate, presumably deriving from head-to-side chain cyclization between the N-

terminal Pro and the Gln side chain, with concomitant  $\text{NH}_3$  loss. This intermediate functions as a precursor to the formation of non-native, or scrambled, product ions (highlighted in grey). Ions marked with a circle ( $^\circ$ ) derive from the corresponding fragment after water loss; ions marked with an asterisk ( $^*$ ) derive from the corresponding fragment after  $\text{NH}_3$  loss.

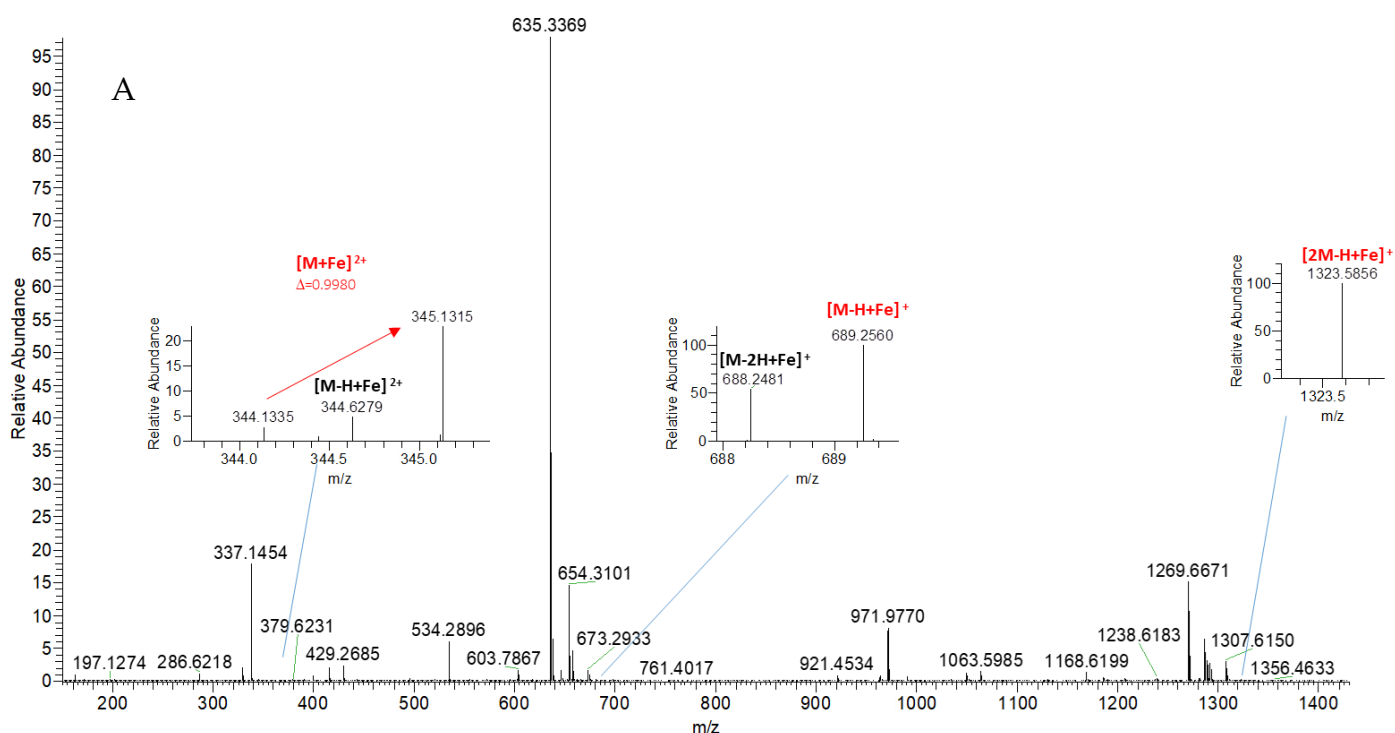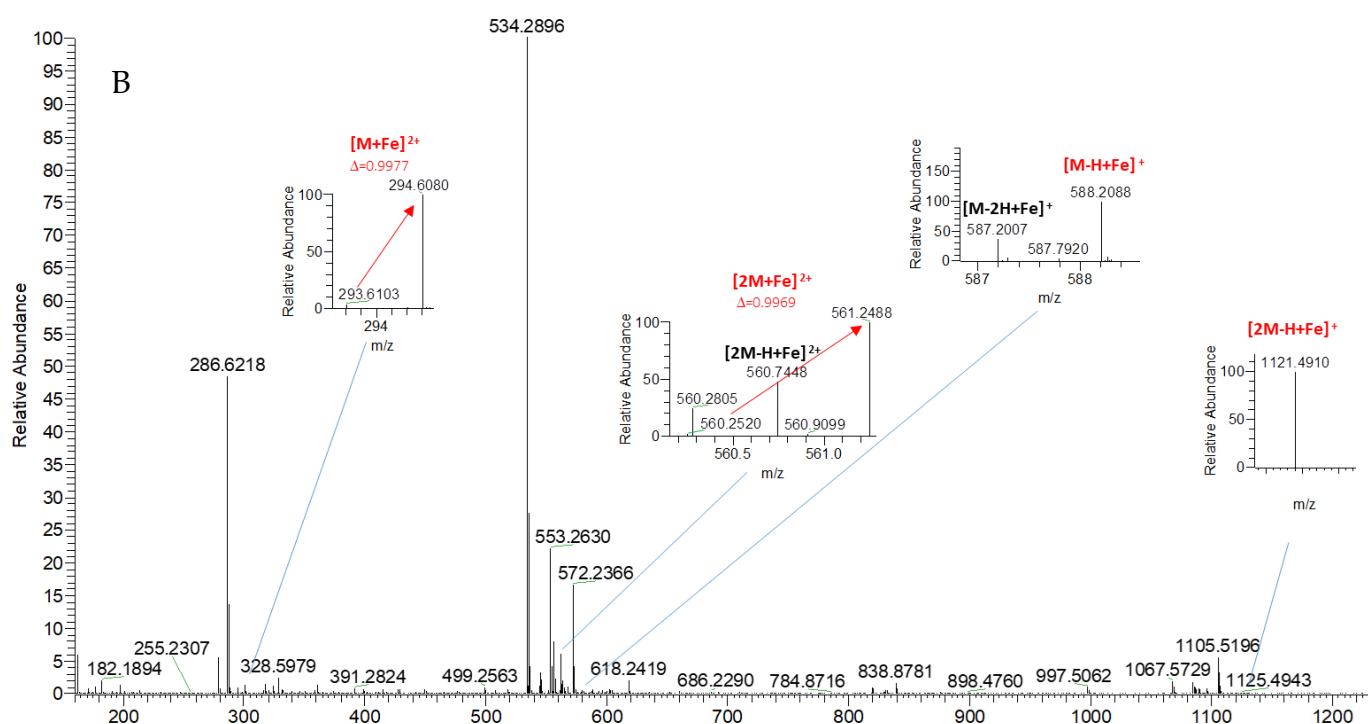

**Figure S27.** HRMS spectra showing iron adducts of compounds **1** (A) and **2** (B). Iron (II) adducts are depicted in red while iron (III) adducts in black. Where discernible, the typical mass difference between the two observable iron isotopes  $^{56}\text{Fe}$  and  $^{54}\text{Fe}$  was highlighted.

**Table S3.** Ferric reducing antioxidant power assay results of compounds **1** and **2**.<sup>a</sup>

|                                    | compound 1 | compound 2  | Ascorbic acid |
|------------------------------------|------------|-------------|---------------|
| Abs 4 min (nm)                     | 0.04       | 0.08        | 0.2           |
| a.a. equivalents ( $\mu\text{M}$ ) | $21 \pm 0$ | $40 \pm 1$  | -             |
| FRAP value                         | $41 \pm 1$ | $80 \pm 2$  | -             |
| Abs 16 min (nm)                    | 0.05       | 0.12        | 0.2           |
| a.a. equivalents ( $\mu\text{M}$ ) | $26 \pm 0$ | $60 \pm 2$  | -             |
| FRAP value                         | $52 \pm 2$ | $121 \pm 4$ | -             |

<sup>a</sup> The samples and controls were analysed at 593 nm in triplicates in order to infer the standard deviation, and the absorbance values reported were corrected for the blank reading (0.07). The results were compared with ascorbic acid 100  $\mu\text{M}$  in order to calculate Ascorbic Acid (a.a.) equivalents values and in turn the FRAP values.

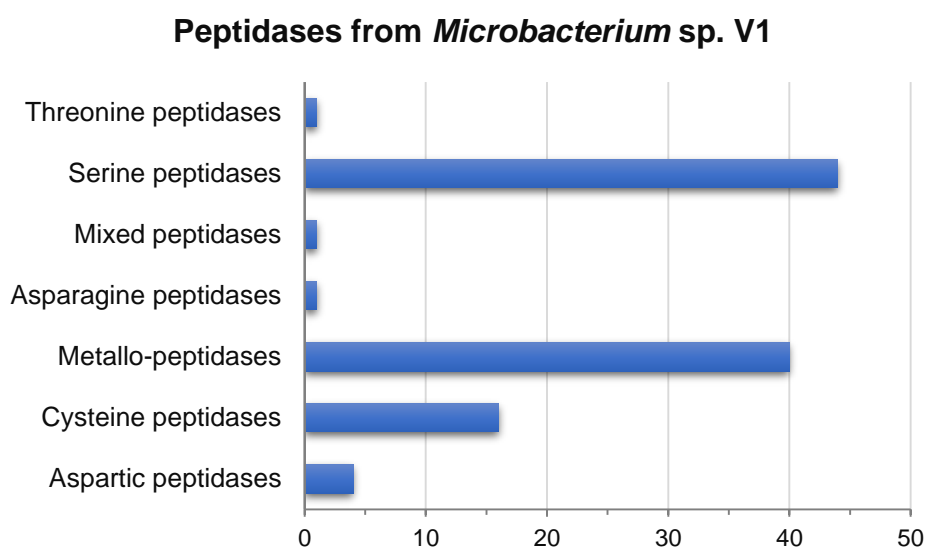

**Figure S28.** Peptidases from *Microbacterium* sp. V1 annotated by using the bioinformatic tool Hotpep-protease.
